# Supplementary material for: Variation in Phytochemical Composition Reveals Distinct Divergence of Aloe vera (L.) Burm.f. From Other Aloe Species: Rationale Behind Selective Preference of Aloe vera in Nutritional and Therapeutic Use
Source: PubMed Central journal article supplement — J Evid Based Complementary Altern Med. 2017 Mar 23;22(4):624–31. doi: 10.1177/2156587217698292 (PMC5871271; doi:10.1177/2156587217698292), 2017-03-23
Supplement: Supplementary_All.pdf [file Supplementary_All.pdf]

## Supplementary Data

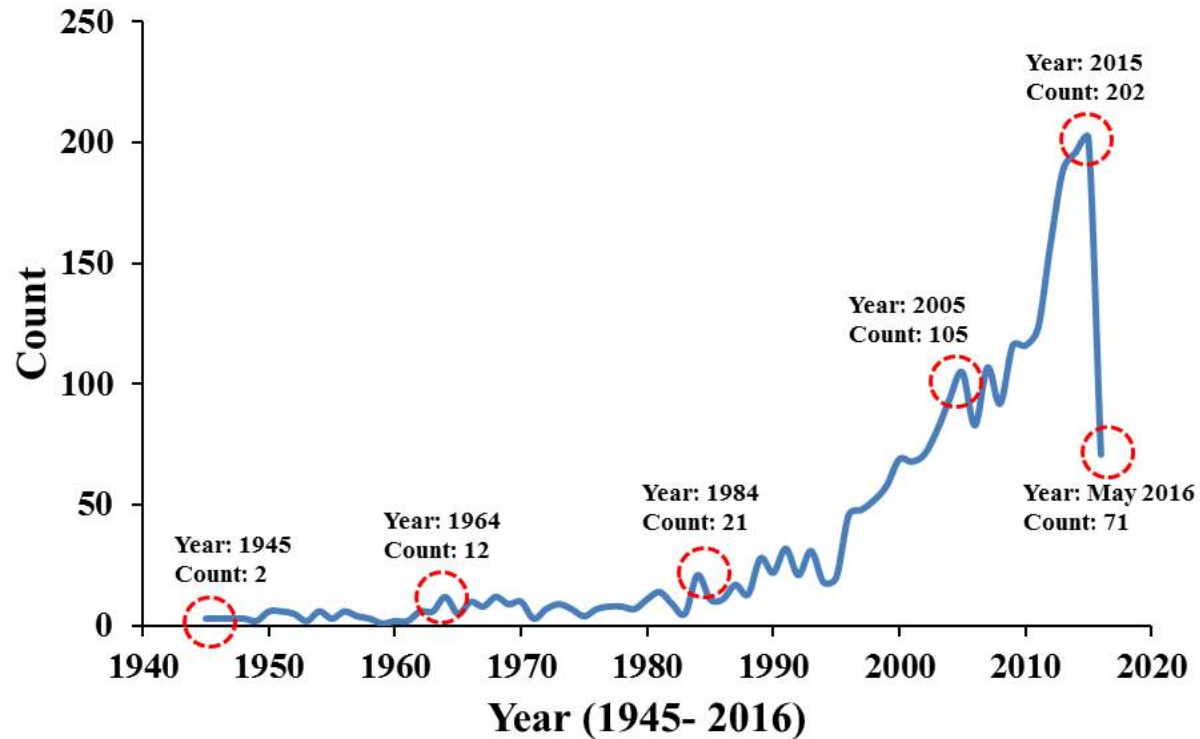

**Supplementary figure 1:** The global trend of increased count in research on *Aloe vera*. The graphical representation is based on data collected from 'results by year' option of the PubMed database with the keyword '*Aloe vera*'.

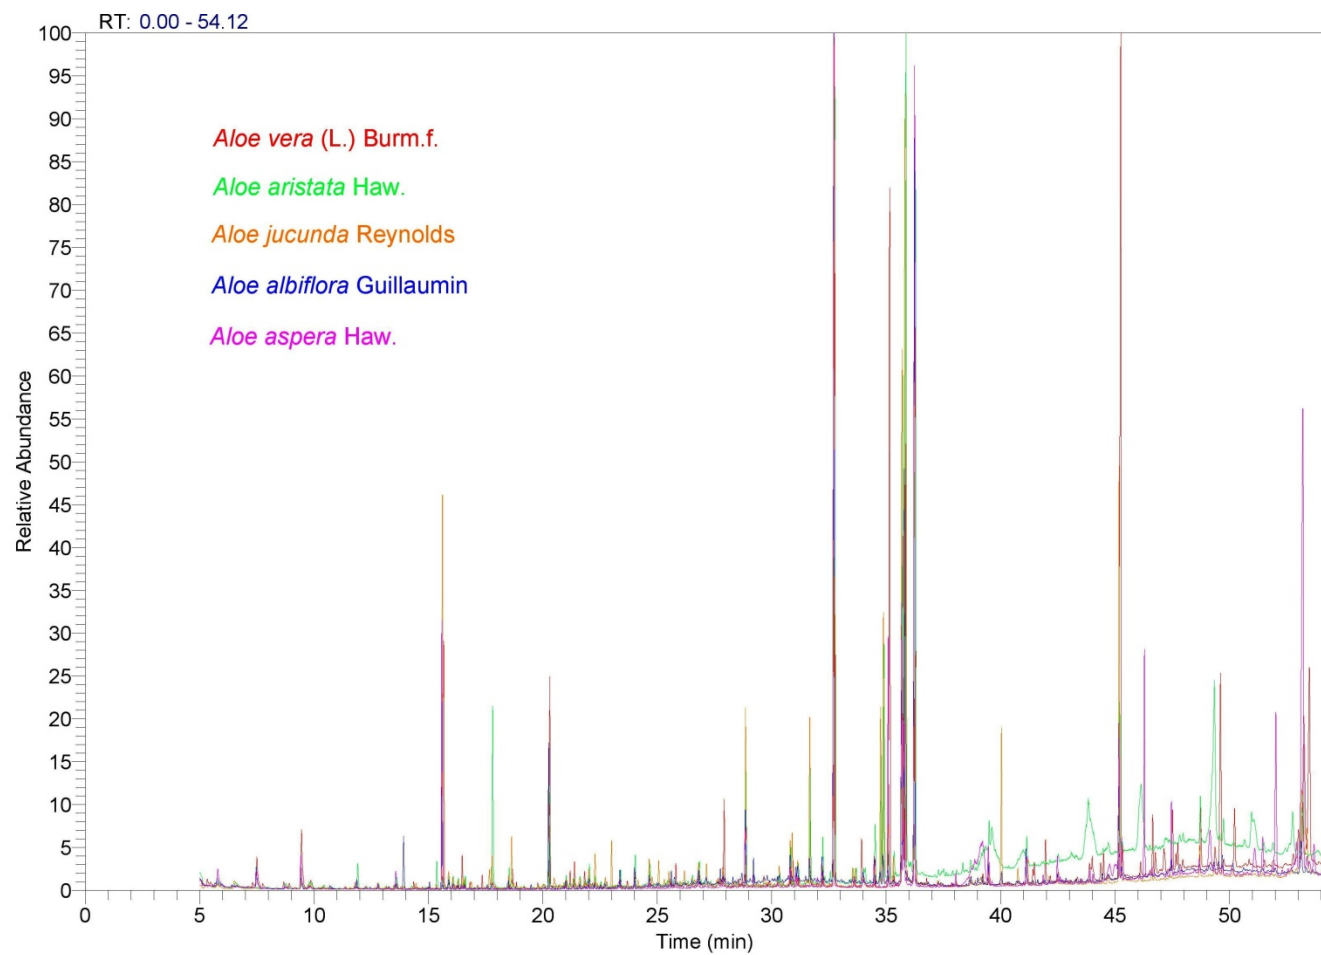

**Supplementary figure 2:** All GC chromatograms merged.

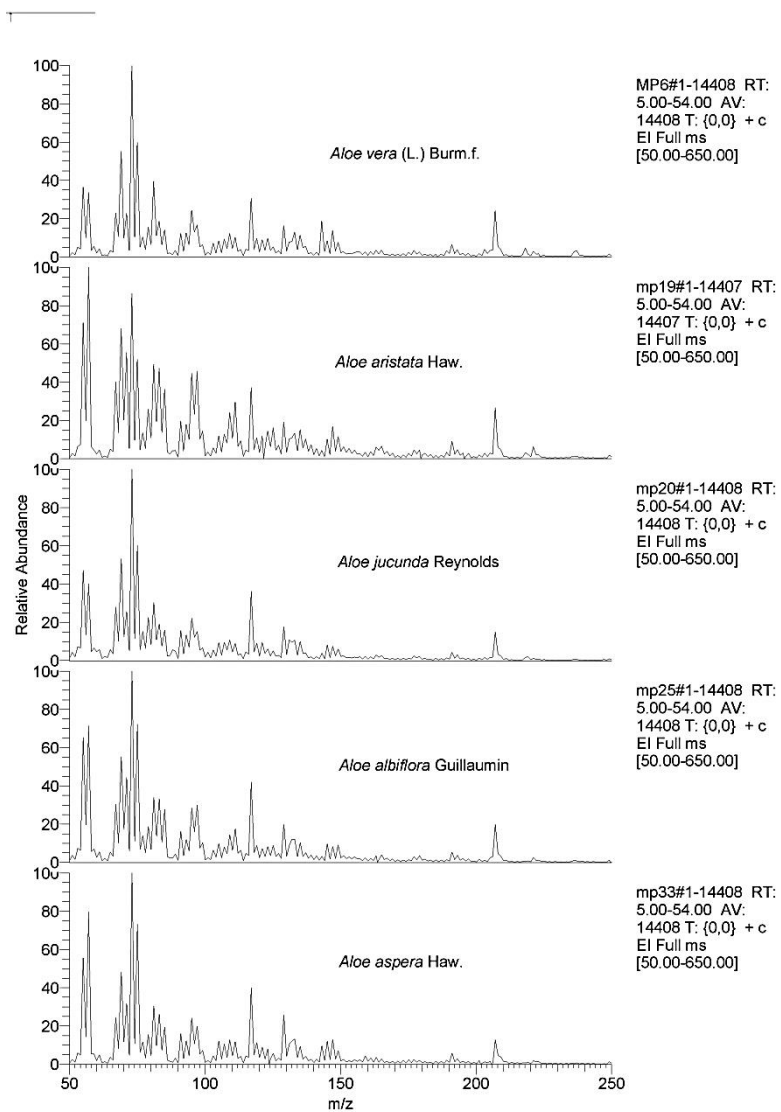

**Supplementary figure 3:** Total mass fragment details (50-250 amu)

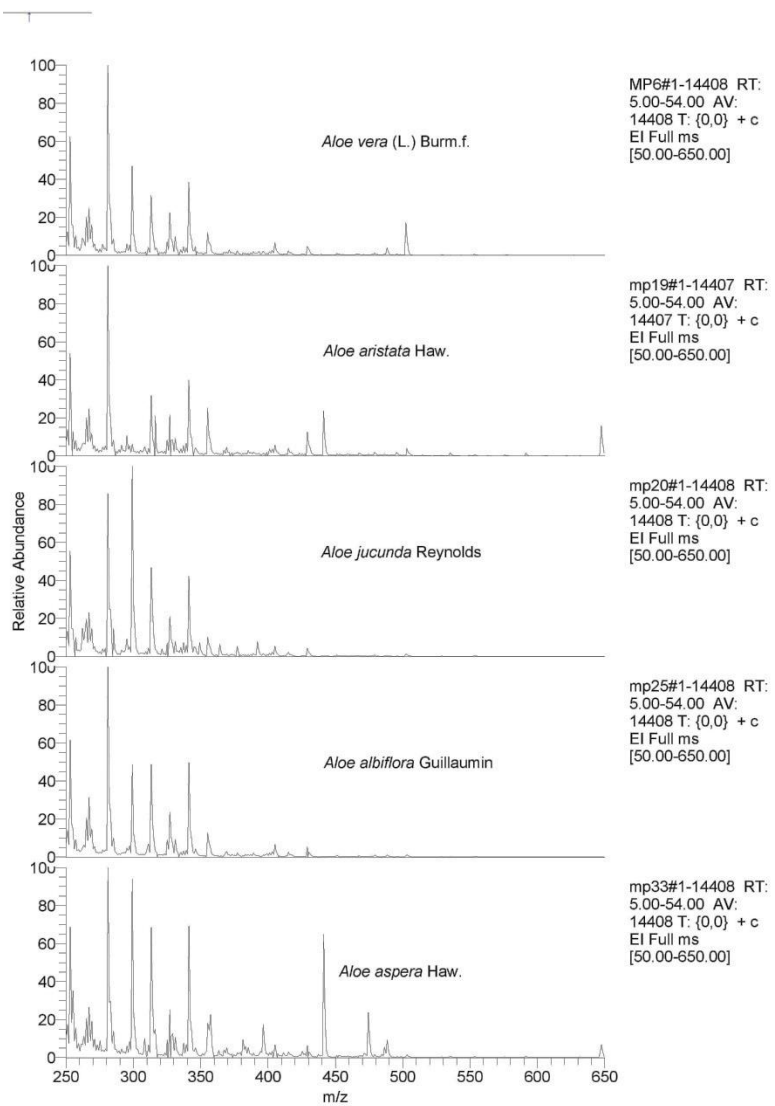

**Supplementary figure 4:** Total mass fragment details (250-650 amu)

Phytochemicals identified in *Aloe vera* (L.) Burm.f.

| Compound name                                    | Formula                                                        | [M-H] <sup>-</sup> | Identifying mass fragments                                                                                                                                                            | Retention time | Relative abundance <sup>#</sup> |
|--------------------------------------------------|----------------------------------------------------------------|--------------------|---------------------------------------------------------------------------------------------------------------------------------------------------------------------------------------|----------------|---------------------------------|
| Ethylene glycol, di-TMS                          | C <sub>8</sub> H <sub>22</sub> O <sub>2</sub> Si <sub>2</sub>  | 205                | 191 (C <sub>7</sub> H <sub>19</sub> O <sub>2</sub> Si <sub>2</sub> ), 147* (C <sub>4</sub> H <sub>11</sub> O <sub>2</sub> Si <sub>2</sub> ), 103 (C <sub>4</sub> H <sub>11</sub> OSi) | 7.31           | 0.94 ± 0.16                     |
| Propylene glycol, di-TMS                         | C <sub>9</sub> H <sub>24</sub> O <sub>2</sub> Si <sub>2</sub>  | 219                | 147 (C <sub>6</sub> H <sub>15</sub> O <sub>2</sub> Si), 117* (C <sub>5</sub> H <sub>13</sub> OSi)                                                                                     | 7.76           | 0.88 ± 0.12                     |
| Butane, 2,3-bis(trimethylsiloxy)-                | C <sub>10</sub> H <sub>26</sub> O <sub>2</sub> Si <sub>2</sub> | 233                | 147 (C <sub>6</sub> H <sub>15</sub> O <sub>2</sub> Si), 117* (C <sub>5</sub> H <sub>13</sub> OSi)                                                                                     | 8.68           | 1.06 ± 0.22                     |
| Glycolic acid, di-TMS                            | C <sub>8</sub> H <sub>20</sub> O <sub>3</sub> Si <sub>2</sub>  | 219                | 147* (C <sub>5</sub> H <sub>11</sub> O <sub>3</sub> Si)                                                                                                                               | 9.85           | 1.48 ± 0.35                     |
| Octadecane, 6-methyl-                            | C <sub>19</sub> H <sub>40</sub>                                | 267                | 98* (C <sub>7</sub> H <sub>14</sub> )                                                                                                                                                 | 13.16          | 0.55 ± 0.08                     |
| 4-Ethylbenzaldehyde                              | C <sub>9</sub> H <sub>10</sub> O                               | 133*               | 119 (C <sub>8</sub> H <sub>7</sub> O), 105 (C <sub>8</sub> H <sub>9</sub> )                                                                                                           | 13.62          | 0.86 ± 0.18                     |
| 4-Hydroxybutyric acid, diTMS                     | C <sub>10</sub> H <sub>24</sub> O <sub>3</sub> Si <sub>2</sub> | 247                | 147* (C <sub>3</sub> H <sub>7</sub> O <sub>3</sub> Si <sub>2</sub> ), 117 (C <sub>4</sub> H <sub>9</sub> O <sub>2</sub> Si)                                                           | 14.35          | 1.38 ± 0.35                     |
| Benzoic acid, TMS                                | C <sub>10</sub> H <sub>14</sub> O <sub>2</sub> Si              | 193                | 179 (C <sub>9</sub> H <sub>11</sub> O <sub>2</sub> Si), 105* (C <sub>7</sub> H <sub>5</sub> O)                                                                                        | 14.50          | 0.48 ± 0.07                     |
| (±)-2-Hydroxyoctanoic acid, trimethylsilyl ester | C <sub>11</sub> H <sub>24</sub> O <sub>3</sub> Si              | 231                | 117 (C <sub>4</sub> H <sub>9</sub> O <sub>2</sub> Si), 97 (C <sub>7</sub> H <sub>13</sub> ), 73* (C <sub>3</sub> H <sub>9</sub> Si)                                                   | 14.74          | 0.51 ± 0.12                     |
| Octanoic acid, TMS ester                         | C <sub>11</sub> H <sub>24</sub> O <sub>2</sub> Si              | 215                | 201* (C <sub>10</sub> H <sub>21</sub> O <sub>2</sub> Si), 145 (C <sub>8</sub> H <sub>17</sub> O <sub>2</sub> )                                                                        | 15.01          | 0.52 ± 0.06                     |
| Phosphoric acid, triTMS                          | C <sub>9</sub> H <sub>27</sub> O <sub>4</sub> PSi <sub>3</sub> | 313                | 299* (C <sub>8</sub> H <sub>24</sub> O <sub>4</sub> PSi <sub>3</sub> ), 211 (C <sub>5</sub> H <sub>16</sub> O <sub>3</sub> PSi)                                                       | 15.67          | 29.34 ± 2.29                    |
| Succinate, bis-TMS                               | C <sub>10</sub> H <sub>22</sub> O <sub>4</sub> Si <sub>2</sub> | 261                | 147* (C <sub>6</sub> H <sub>15</sub> O <sub>2</sub> Si)                                                                                                                               | 16.48          | 5.02 ± 0.84                     |
| Methyl succinic acid, bis-TMS                    | C <sub>11</sub> H <sub>24</sub> O <sub>4</sub> Si <sub>2</sub> | 275                | 147* (C <sub>6</sub> H <sub>15</sub> O <sub>2</sub> Si)                                                                                                                               | 16.82          | 0.94 ± 0.25                     |
| Glyceric acid, (3TMS)                            | C <sub>12</sub> H <sub>30</sub> O <sub>4</sub> Si <sub>3</sub> | 321                | 189 (C <sub>7</sub> H <sub>17</sub> O <sub>2</sub> Si <sub>2</sub> ), 147 (C <sub>5</sub> H <sub>11</sub> O <sub>3</sub> Si), 73* (C <sub>3</sub> H <sub>9</sub> Si)                  | 17.15          | 0.74 ± 0.28                     |
| Fumaric acid, bis-TMS ester                      | C <sub>10</sub> H <sub>20</sub> O <sub>4</sub> Si <sub>2</sub> | 259                | 245* (C <sub>9</sub> H <sub>17</sub> O <sub>4</sub> Si <sub>2</sub> ), 147 (C <sub>6</sub> H <sub>13</sub> O <sub>2</sub> Si <sub>2</sub> )                                           | 17.35          | 1.85 ± 0.49                     |

|                                         |                                                                 |      |                                                                                                                                                                                                                                                          |       |              |
|-----------------------------------------|-----------------------------------------------------------------|------|----------------------------------------------------------------------------------------------------------------------------------------------------------------------------------------------------------------------------------------------------------|-------|--------------|
| Nonanoic acid, TMS ester                | C <sub>12</sub> H <sub>26</sub> O <sub>2</sub> Si               | 229  | 215* (C <sub>11</sub> H <sub>23</sub> O <sub>2</sub> Si), 117 (C <sub>4</sub> H <sub>9</sub> O <sub>2</sub> Si)                                                                                                                                          | 17.60 | 0.51 ± 0.12  |
| Phenol, 2-methoxy-3-(2-propenyl)-       | C <sub>10</sub> H <sub>12</sub> O <sub>2</sub>                  | 163* | 149 (C <sub>9</sub> H <sub>9</sub> O <sub>2</sub> ), 131 (C <sub>9</sub> H <sub>7</sub> O)                                                                                                                                                               | 17.82 | 0.98 ± 0.24  |
| Tetradecane                             | C <sub>14</sub> H <sub>30</sub>                                 | 197  | 85 (C <sub>6</sub> H <sub>13</sub> ), 71 (C <sub>5</sub> H <sub>11</sub> ), 57* (C <sub>4</sub> H <sub>9</sub> )                                                                                                                                         | 18.54 | 0.82 ± 0.35  |
| Methyleugenol                           | C <sub>11</sub> H <sub>14</sub> O <sub>2</sub>                  | 177* | 163 (C <sub>10</sub> H <sub>11</sub> O <sub>2</sub> ), 147 (C <sub>10</sub> H <sub>11</sub> O)                                                                                                                                                           | 18.67 | 2.59 ± 0.52  |
| Glutarate, bis-TMS                      | C <sub>11</sub> H <sub>24</sub> O <sub>4</sub> Si <sub>2</sub>  | 275  | 204 (C <sub>8</sub> H <sub>16</sub> O <sub>4</sub> Si), 158 (C <sub>7</sub> H <sub>14</sub> O <sub>2</sub> Si), 147* (C <sub>6</sub> H <sub>15</sub> OSi)                                                                                                | 18.85 | 0.96 ± 0.27  |
| 1-Dodecanol, O-TMS                      | C <sub>15</sub> H <sub>34</sub> OSi                             | 257  | 243* (C <sub>14</sub> H <sub>31</sub> OSi)                                                                                                                                                                                                               | 19.78 | 0.88 ± 0.24  |
| 4-Allyl-2-methoxyphenoxy-TMS            | C <sub>13</sub> H <sub>20</sub> O <sub>2</sub> Si               | 235  | 206* (C <sub>11</sub> H <sub>14</sub> O <sub>2</sub> Si), 179 (C <sub>9</sub> H <sub>11</sub> O <sub>2</sub> Si)                                                                                                                                         | 20.30 | 25.26 ± 2.29 |
| β-copaene                               | C <sub>15</sub> H <sub>24</sub>                                 | 203  | 161* (C <sub>12</sub> H <sub>17</sub> ), 119 (C <sub>6</sub> H <sub>13</sub> ), 105 (C <sub>7</sub> H <sub>15</sub> )                                                                                                                                    | 20.59 | 0.47 ± 0.05  |
| Malic acid, tris-TMS                    | C <sub>13</sub> H <sub>30</sub> O <sub>5</sub> Si <sub>3</sub>  | 349  | 245 (C <sub>9</sub> H <sub>17</sub> O <sub>4</sub> Si <sub>2</sub> ), 233 (C <sub>9</sub> H <sub>21</sub> O <sub>3</sub> Si <sub>2</sub> ), 147 (C <sub>8</sub> H <sub>22</sub> O <sub>2</sub> Si <sub>2</sub> ), 73* (C <sub>3</sub> H <sub>9</sub> Si) | 21.20 | 2.53 ± 0.34  |
| Adipic acid, (2TMS)                     | C <sub>12</sub> H <sub>26</sub> O <sub>4</sub> Si <sub>2</sub>  | 289  | 141 (C <sub>7</sub> H <sub>13</sub> OSi), 111 (C <sub>6</sub> H <sub>7</sub> O <sub>2</sub> ), 73* (C <sub>3</sub> H <sub>9</sub> Si)                                                                                                                    | 21.38 | 3.36 ± 0.68  |
| 2-methyl-1-Hexadecanol                  | C <sub>17</sub> H <sub>36</sub> O                               | 255  | 69 (C <sub>5</sub> H <sub>9</sub> ), 57* (C <sub>4</sub> H <sub>9</sub> )                                                                                                                                                                                | 21.64 | 0.98 ± 0.20  |
| Pyroglutamic acid, bis(trimethylsilyl)- | C <sub>11</sub> H <sub>23</sub> NO <sub>3</sub> Si <sub>2</sub> | 272  | 156* (C <sub>7</sub> H <sub>14</sub> NOSi)                                                                                                                                                                                                               | 21.82 | 2.28 ± 0.47  |
| m-Hydroxybenzoic acid, (TMS)            | C <sub>13</sub> H <sub>22</sub> O <sub>3</sub> Si <sub>2</sub>  | 281  | 267* (C <sub>12</sub> H <sub>19</sub> O <sub>3</sub> Si <sub>2</sub> ), 193 (C <sub>10</sub> H <sub>13</sub> O <sub>2</sub> Si)                                                                                                                          | 22.78 | 1.01 ± 0.12  |
| Pimelic acid, bis-TMS                   | C <sub>13</sub> H <sub>28</sub> O <sub>4</sub> Si <sub>2</sub>  | 303  | 155 (C <sub>8</sub> H <sub>15</sub> OSi), 125 (C <sub>7</sub> H <sub>9</sub> O <sub>2</sub> Si), 73* (C <sub>3</sub> H <sub>9</sub> Si)                                                                                                                  | 23.69 | 1.14 ± 0.18  |
| Dodecanoic acid, 1-methylethyl ester    | C <sub>15</sub> H <sub>30</sub> O <sub>2</sub>                  | 241  | 102 (C <sub>5</sub> H <sub>10</sub> O <sub>2</sub> ), 60* (C <sub>3</sub> H <sub>8</sub> O)                                                                                                                                                              | 24.04 | 2.24 ± 0.56  |
| 4-Hydroxybenzoic acid (2TMS)            | C <sub>13</sub> H <sub>22</sub> O <sub>3</sub> Si <sub>2</sub>  | 281  | 267* (C <sub>12</sub> H <sub>19</sub> O <sub>3</sub> Si <sub>2</sub> ), 193 (C <sub>10</sub> H <sub>13</sub> O <sub>2</sub> Si)                                                                                                                          | 24.20 | 0.58 ± 0.33  |

|                                                         |                                                                |     |                                                                                                                                                                        |       |              |
|---------------------------------------------------------|----------------------------------------------------------------|-----|------------------------------------------------------------------------------------------------------------------------------------------------------------------------|-------|--------------|
| Lauric acid (TMS)                                       | C <sub>15</sub> H <sub>32</sub> O <sub>2</sub> Si              | 271 | 257 (C <sub>14</sub> H <sub>29</sub> O <sub>2</sub> Si), 117* (C <sub>4</sub> H <sub>9</sub> O <sub>2</sub> Si)                                                        | 24.68 | 2.16 ± 0.69  |
| 1-[(Trimethylsilyl)oxy]-2-methylantraquinone            | C <sub>18</sub> H <sub>18</sub> O <sub>3</sub> Si              | 309 | 295* (C <sub>17</sub> H <sub>15</sub> O <sub>3</sub> Si), 265 (C <sub>16</sub> H <sub>13</sub> O <sub>2</sub> Si)                                                      | 25.55 | 1.32 ± 0.43  |
| Suberic acid (2TMS)                                     | C <sub>14</sub> H <sub>30</sub> O <sub>4</sub> Si <sub>2</sub> | 317 | 169 (C <sub>9</sub> H <sub>17</sub> O <sub>4</sub> Si), 129 (C <sub>5</sub> H <sub>9</sub> O <sub>2</sub> Si), 73* (C <sub>3</sub> H <sub>9</sub> Si)                  | 25.81 | 3.36 ± 0.48  |
| Geranyl isovalerate                                     | C <sub>15</sub> H <sub>26</sub> O <sub>2</sub>                 | 237 | 121 (C <sub>9</sub> H <sub>13</sub> ), 103 (C <sub>5</sub> H <sub>11</sub> O <sub>2</sub> ), 85* (C <sub>5</sub> H <sub>9</sub> O)                                     | 25.90 | 0.61 ± 0.15  |
| Tetradecane, 2,6,10-trimethyl-                          | C <sub>17</sub> H <sub>36</sub>                                | 239 | 85 (C <sub>6</sub> H <sub>13</sub> ), 71 (C <sub>5</sub> H <sub>11</sub> ), 57* (C <sub>4</sub> H <sub>9</sub> )                                                       | 26.85 | 2.12 ± 0.62  |
| 1,3-Benzenedicarboxylic acid, bis(trimethylsilyl) ester | C <sub>14</sub> H <sub>22</sub> O <sub>4</sub> Si <sub>2</sub> | 309 | 295* (C <sub>13</sub> H <sub>19</sub> O <sub>4</sub> Si <sub>2</sub> ), 221 (C <sub>11</sub> H <sub>13</sub> O <sub>3</sub> Si)                                        | 27.79 | 2.38 ± 0.68  |
| Azelaic acid, diTMS                                     | C <sub>15</sub> H <sub>32</sub> O <sub>4</sub> Si <sub>2</sub> | 331 | 201 (C <sub>10</sub> H <sub>21</sub> O <sub>2</sub> Si), 129 (C <sub>5</sub> H <sub>9</sub> O <sub>2</sub> Si), 73* (C <sub>3</sub> H <sub>9</sub> Si)                 | 27.92 | 2.06 ± 0.41  |
| Protocatechuic acid (TMS)                               | C <sub>16</sub> H <sub>30</sub> O <sub>4</sub> Si <sub>3</sub> | 369 | 281 (C <sub>13</sub> H <sub>21</sub> O <sub>2</sub> Si <sub>3</sub> ), 193 (C <sub>9</sub> H <sub>10</sub> O <sub>3</sub> Si), 73* (C <sub>3</sub> H <sub>9</sub> Si)  | 28.53 | 1.49 ± 0.37  |
| Tetradecanoic acid, TMS                                 | C <sub>17</sub> H <sub>36</sub> O <sub>2</sub> Si              | 299 | 285 (C <sub>16</sub> H <sub>33</sub> O <sub>2</sub> Si), 117 (C <sub>4</sub> H <sub>9</sub> O <sub>2</sub> Si), 73* (C <sub>3</sub> H <sub>9</sub> Si)                 | 28.89 | 8.36 ± 0.96  |
| Sebacic acid (bis-TMS)                                  | C <sub>16</sub> H <sub>34</sub> O <sub>4</sub> Si <sub>2</sub> | 245 | 129 (C <sub>5</sub> H <sub>9</sub> O <sub>2</sub> Si), 215 (C <sub>12</sub> H <sub>23</sub> O <sub>2</sub> Si), 73* (C <sub>3</sub> H <sub>9</sub> Si)                 | 29.90 | 13.63 ± 3.53 |
| Pentadecanoic acid, TMS ester                           | C <sub>18</sub> H <sub>38</sub> O <sub>2</sub> Si              | 313 | 299 (C <sub>17</sub> H <sub>35</sub> O <sub>2</sub> Si), 117* (C <sub>4</sub> H <sub>9</sub> O <sub>2</sub> Si)                                                        | 30.84 | 1.94 ± 0.42  |
| Phenol, 2,4,6-tris(1,1-dimethylethyl)-                  | C <sub>18</sub> H <sub>30</sub> O                              | 261 | 247* (C <sub>17</sub> H <sub>27</sub> O)                                                                                                                               | 30.93 | 2.31 ± 0.45  |
| Undecandioic acid di-TMS                                | C <sub>17</sub> H <sub>36</sub> O <sub>4</sub> Si <sub>2</sub> | 359 | 345 (C <sub>16</sub> H <sub>33</sub> O <sub>4</sub> Si <sub>2</sub> ), 229 (C <sub>12</sub> H <sub>25</sub> O <sub>2</sub> Si), 73* (C <sub>3</sub> H <sub>9</sub> Si) | 31.78 | 1.54 ± 0.28  |
| Palmitelaidic acid, trimethylsilyl ester                | C <sub>19</sub> H <sub>38</sub> O <sub>2</sub> Si              | 325 | 311 (C <sub>18</sub> H <sub>35</sub> O <sub>2</sub> Si), 117 (C <sub>4</sub> H <sub>9</sub> O <sub>2</sub> Si), 73* (C <sub>3</sub> H <sub>9</sub> Si)                 | 32.24 | 1.36 ± 0.44  |
| Palmitic acid, TMS                                      | C <sub>19</sub> H <sub>40</sub> O <sub>2</sub> Si              | 327 | 313 (C <sub>18</sub> H <sub>37</sub> O <sub>2</sub> Si), 117 (C <sub>4</sub> H <sub>9</sub> O <sub>2</sub> Si), 73*                                                    | 32.76 | 71.74 ± 2.26 |

|                                                                 |                                                                |      |                                                                                                                                                                                        |       |              |
|-----------------------------------------------------------------|----------------------------------------------------------------|------|----------------------------------------------------------------------------------------------------------------------------------------------------------------------------------------|-------|--------------|
|                                                                 |                                                                |      | (C <sub>3</sub> H <sub>9</sub> Si)                                                                                                                                                     |       |              |
| Phytol                                                          | C <sub>20</sub> H <sub>40</sub> O                              | 295  | 123 (C <sub>9</sub> H <sub>15</sub> ), 71* (C <sub>4</sub> H <sub>7</sub> O)                                                                                                           | 33.93 | 5.27 ± 0.97  |
| (2E)-3,7,11,15-Tetramethyl-2-hexadecenyl trimethylsilyl ether # | C <sub>23</sub> H <sub>48</sub> OSi                            | 367  | 143* (C <sub>7</sub> H <sub>15</sub> OSi), 123 (C <sub>9</sub> H <sub>15</sub> )                                                                                                       | 35.16 | 81.92 ± 1.52 |
| Dodecanedioic acid di-TMS                                       | C <sub>18</sub> H <sub>38</sub> O <sub>4</sub> Si <sub>2</sub> | 373  | 359* (C <sub>17</sub> H <sub>35</sub> O <sub>4</sub> Si <sub>2</sub> ), 243 (C <sub>13</sub> H <sub>27</sub> O <sub>2</sub> Si), 129 (C <sub>5</sub> H <sub>9</sub> O <sub>2</sub> Si) | 35.35 | 1.55 ± 0.30  |
| Linoleic acid, TMS                                              | C <sub>21</sub> H <sub>40</sub> O <sub>2</sub> Si              | 351  | 262 (C <sub>18</sub> H <sub>30</sub> O), 129 (C <sub>5</sub> H <sub>9</sub> O <sub>2</sub> Si), 73* (C <sub>3</sub> H <sub>9</sub> Si)                                                 | 35.72 | 40.06 ± 3.54 |
| α-Linolenic acid, TMS                                           | C <sub>21</sub> H <sub>38</sub> O <sub>2</sub> Si              | 349  | 129 (C <sub>5</sub> H <sub>9</sub> O <sub>2</sub> Si), 95 (C <sub>7</sub> H <sub>11</sub> ), 73* (C <sub>3</sub> H <sub>9</sub> Si)                                                    | 35.85 | 55.28 ± 1.72 |
| Octadecanoic acid, TMS                                          | C <sub>21</sub> H <sub>44</sub> O <sub>2</sub> Si              | 355  | 341 (C <sub>20</sub> H <sub>41</sub> O <sub>2</sub> Si), 117* (C <sub>4</sub> H <sub>9</sub> O <sub>2</sub> Si)                                                                        | 36.28 | 63.51 ± 1.26 |
| Eicosanoic acid, TMS ester                                      | C <sub>23</sub> H <sub>48</sub> O <sub>2</sub> Si              | 383  | 145 (C <sub>6</sub> H <sub>13</sub> O <sub>2</sub> Si), 117 (C <sub>4</sub> H <sub>9</sub> O <sub>2</sub> Si), 73* (C <sub>3</sub> H <sub>9</sub> Si)                                  | 39.51 | 1.04 ± 0.20  |
| 2-Monopalmitoylglycerol trimethylsilyl ether                    | C <sub>25</sub> H <sub>54</sub> O <sub>4</sub> Si <sub>2</sub> | 473  | 239 (C <sub>16</sub> H <sub>31</sub> O), 218 (C <sub>9</sub> H <sub>22</sub> O <sub>2</sub> Si <sub>2</sub> ), 129* (C <sub>6</sub> H <sub>13</sub> OSi)                               | 41.48 | 1.29 ± 0.42  |
| 1-Monopalmitin trimethylsilyl ether                             | C <sub>25</sub> H <sub>54</sub> O <sub>4</sub> Si <sub>2</sub> | 473  | 313 (C <sub>17</sub> H <sub>33</sub> O <sub>3</sub> Si), 218 (C <sub>9</sub> H <sub>22</sub> O <sub>2</sub> Si <sub>2</sub> ), 129* (C <sub>6</sub> H <sub>13</sub> O)                 | 41.97 | 4.76 ± 0.74  |
| Docosanoic acid, TMS ester                                      | C <sub>25</sub> H <sub>52</sub> O <sub>2</sub> Si              | 411  | 397 (C <sub>24</sub> H <sub>49</sub> O <sub>2</sub> Si), 117* (C <sub>4</sub> H <sub>9</sub> O <sub>2</sub> Si)                                                                        | 42.53 | 0.89 ± 0.26  |
| 9-Octadecenoic acid, 1,3-bis-(OTMS)-2-propyl ester              | C <sub>27</sub> H <sub>56</sub> O <sub>4</sub> Si <sub>2</sub> | 499  | 221 (C <sub>16</sub> H <sub>29</sub> ), 203 (C <sub>8</sub> H <sub>19</sub> O <sub>2</sub> Si <sub>2</sub> ), 73* (C <sub>3</sub> H <sub>9</sub> Si)                                   | 44.50 | 2.57 ± 0.54  |
| Squalene                                                        | C <sub>30</sub> H <sub>50</sub>                                | 409  | 81 (C <sub>6</sub> H <sub>9</sub> ), 69* (C <sub>5</sub> H <sub>9</sub> )                                                                                                              | 45.25 | 98.26 ± 2.83 |
| Tetracosanoic acid, trimethylsilyl ester                        | C <sub>27</sub> H <sub>56</sub> O <sub>2</sub> Si              | 439  | 145 (C <sub>6</sub> H <sub>13</sub> O <sub>2</sub> Si), 117 (C <sub>4</sub> H <sub>9</sub> O <sub>2</sub> Si), 73* (C <sub>3</sub> H <sub>9</sub> Si)                                  | 45.33 | 6.53 ± 0.44  |
| Heptacosane                                                     | C <sub>27</sub> H <sub>56</sub>                                | 379  | 85 (C <sub>6</sub> H <sub>13</sub> ), 71 (C <sub>5</sub> H <sub>11</sub> ), 57* (C <sub>4</sub> H <sub>9</sub> )                                                                       | 48.74 | 8.76 ± 0.43  |
| (+)-α-Tocopherol, O-                                            | C <sub>32</sub> H <sub>58</sub> O <sub>2</sub> Si              | 501* | 277 (C <sub>16</sub> H <sub>25</sub> O <sub>2</sub> Si), 237 (C <sub>17</sub> H <sub>33</sub> )                                                                                        | 49.61 | 19.25 ± 1.06 |



|                         |                                     |     |                                                                                                                              |       |                  |
|-------------------------|-------------------------------------|-----|------------------------------------------------------------------------------------------------------------------------------|-------|------------------|
| trimethylsilyl-         |                                     |     |                                                                                                                              |       |                  |
| $\beta$ -Sitosterol TMS | C <sub>32</sub> H <sub>58</sub> OSi | 485 | 396 (C <sub>29</sub> H <sub>48</sub> ), 255 (C <sub>19</sub> H <sub>27</sub> ), 129*<br>(C <sub>6</sub> H <sub>13</sub> OSi) | 53.25 | 16.87 $\pm$ 0.82 |
| $\beta$ -Amyrin, TMS    | C <sub>33</sub> H <sub>58</sub> OSi | 487 | 218* (C <sub>16</sub> H <sub>26</sub> ), 203 (C <sub>15</sub> H <sub>23</sub> )                                              | 53.49 | 23.48 $\pm$ 2.57 |

\* = Base peak; # = Relative abundance after baseline normalization.

### Phytochemicals identified in *Aloe aristata* Haw.

| Compound name                       | Formula                                                        | [M-H] <sup>-</sup> | Identifying mass fragments                                                                                                                             | Retention time | Relative abundance |
|-------------------------------------|----------------------------------------------------------------|--------------------|--------------------------------------------------------------------------------------------------------------------------------------------------------|----------------|--------------------|
| Benzeneacetaldehyde                 | C <sub>8</sub> H <sub>8</sub> O                                | 119                | 91* (C <sub>7</sub> H <sub>7</sub> )                                                                                                                   | 8.77           | 0.46 ± 0.13        |
| Lactic acid, bis-TMS                | C <sub>9</sub> H <sub>22</sub> O <sub>3</sub> Si <sub>2</sub>  | 233                | 147 (C <sub>5</sub> H <sub>11</sub> O <sub>3</sub> Si), 117 (C <sub>5</sub> H <sub>13</sub> O <sub>3</sub> Si), 73* (C <sub>3</sub> H <sub>9</sub> Si) | 9.46           | 0.38 ± 0.54        |
| 2-Undecanethiol, 2-methyl-          | C <sub>12</sub> H <sub>26</sub> S                              | 201                | 83 (C <sub>6</sub> H <sub>11</sub> ), 69 (C <sub>5</sub> H <sub>9</sub> ), 55* (C <sub>4</sub> H <sub>7</sub> )                                        | 9.79           | 0.94 ± 0.17        |
| Benzaldehyde, 2,5-dimethyl-         | C <sub>9</sub> H <sub>10</sub> O                               | 133*               | 105 (C <sub>8</sub> H <sub>9</sub> )                                                                                                                   | 13.62          | 1.12 ± 0.28        |
| Phenol, 2-ethyl, TMS                | C <sub>11</sub> H <sub>18</sub> OSi                            | 193                | 179 (C <sub>10</sub> H <sub>15</sub> OSi), 103 (C <sub>4</sub> H <sub>11</sub> OSi), 73* (C <sub>3</sub> H <sub>9</sub> Si)                            | 13.95          | 0.31 ± 0.06        |
| 3-Ethylphenol, trimethylsilyl ether | C <sub>11</sub> H <sub>18</sub> OSi                            | 193                | 179* (C <sub>10</sub> H <sub>15</sub> OSi)                                                                                                             | 14.27          | 0.55 ± 0.12        |
| p-Ethylguaiacol                     | C <sub>9</sub> H <sub>12</sub> O <sub>2</sub>                  | 151                | 137* (C <sub>8</sub> H <sub>9</sub> O <sub>2</sub> ), 122 (C <sub>7</sub> H <sub>6</sub> O <sub>2</sub> )                                              | 15.37          | 1.58 ± 0.32        |
| Phosphoric acid, triTMS             | C <sub>9</sub> H <sub>27</sub> O <sub>4</sub> PSi <sub>3</sub> | 313                | 299* (C <sub>8</sub> H <sub>24</sub> O <sub>4</sub> PSi <sub>3</sub> ), 211 (C <sub>5</sub> H <sub>16</sub> O <sub>3</sub> PSi)                        | 15.62          | 1.27 ± 0.47        |
| Tridecane                           | C <sub>13</sub> H <sub>28</sub>                                | 183                | 85 (C <sub>6</sub> H <sub>13</sub> ), 71 (C <sub>5</sub> H <sub>11</sub> ), 57* (C <sub>4</sub> H <sub>9</sub> )                                       | 15.90          | 1.31 ± 0.29        |
| 3-Eicosene, (E)-                    | C <sub>20</sub> H <sub>40</sub>                                | 279                | 83 (C <sub>6</sub> H <sub>11</sub> ), 69 (C <sub>5</sub> H <sub>9</sub> ), 57* (C <sub>4</sub> H <sub>9</sub> )                                        | 16.08          | 1.26 ± 0.25        |
| 2-methyl-1-Hexadecanol              | C <sub>17</sub> H <sub>36</sub> O                              | 255                | 69 (C <sub>5</sub> H <sub>9</sub> ), 57* (C <sub>4</sub> H <sub>9</sub> )                                                                              | 16.31          | 1.45 ± 0.61        |
| Dodecane, 2,6,11-trimethyl-         | C <sub>15</sub> H <sub>32</sub>                                | 211                | 85 (C <sub>6</sub> H <sub>13</sub> ), 71 (C <sub>5</sub> H <sub>11</sub> ), 57* (C <sub>4</sub> H <sub>9</sub> )                                       | 16.61          | 1.38 ± 0.34        |
| Eugenol                             | C <sub>10</sub> H <sub>12</sub> O <sub>2</sub>                 | 163*               | 149 (C <sub>9</sub> H <sub>9</sub> O <sub>2</sub> ), 131 (C <sub>9</sub> H <sub>7</sub> O <sub>2</sub> ), 103                                          | 17.81          | 20.53 ± 1.55       |

|                                                             |                                                   |      |                                                                                                                                                                         |       |              |
|-------------------------------------------------------------|---------------------------------------------------|------|-------------------------------------------------------------------------------------------------------------------------------------------------------------------------|-------|--------------|
|                                                             |                                                   |      | (C <sub>7</sub> H <sub>3</sub> O)                                                                                                                                       |       |              |
| Vanillin, TMS                                               | C <sub>11</sub> H <sub>16</sub> O <sub>3</sub> Si | 223  | 209 (C <sub>10</sub> H <sub>13</sub> O <sub>3</sub> Si), 194* (C <sub>9</sub> H <sub>10</sub> O <sub>3</sub> Si)                                                        | 18.53 | 2.29 ± 0.86  |
| Methyleugenol                                               | C <sub>11</sub> H <sub>14</sub> O <sub>2</sub>    | 177* | 163 (C <sub>10</sub> H <sub>11</sub> O <sub>2</sub> ), 147 (C <sub>10</sub> H <sub>11</sub> O)                                                                          | 18.66 | 1.01 ± 0.27  |
| 4-Allyl-2-methoxyphenoxy-TMS                                | C <sub>13</sub> H <sub>20</sub> O <sub>2</sub> Si | 235  | 206* (C <sub>11</sub> H <sub>14</sub> O <sub>2</sub> Si), 179 (C <sub>9</sub> H <sub>11</sub> O <sub>2</sub> Si)                                                        | 20.28 | 10.14 ± 0.89 |
| Hexadecane                                                  | C <sub>16</sub> H <sub>34</sub>                   | 225  | 85 (C <sub>6</sub> H <sub>13</sub> ), 71 (C <sub>5</sub> H <sub>11</sub> ), 57* (C <sub>4</sub> H <sub>9</sub> )                                                        | 21.03 | 1.22 ± 0.42  |
| Phenol, 2,4-bis(1,1-dimethylethyl)-<br>(Antioxidant No. 33) | C <sub>14</sub> H <sub>22</sub> O                 | 205  | 191* (C <sub>13</sub> H <sub>19</sub> O), 57 (C <sub>4</sub> H <sub>9</sub> )                                                                                           | 21.36 | 1.26 ± 0.36  |
| Nonadecane                                                  | C <sub>19</sub> H <sub>40</sub>                   | 267  | 85 (C <sub>6</sub> H <sub>13</sub> ), 71 (C <sub>5</sub> H <sub>11</sub> ), 57* (C <sub>4</sub> H <sub>9</sub> )                                                        | 23.40 | 1.87 ± 0.28  |
| Dodecanoic acid, 1-methylethyl ester                        | C <sub>15</sub> H <sub>30</sub> O <sub>2</sub>    | 241  | 102 (C <sub>5</sub> H <sub>10</sub> O <sub>2</sub> ), 60* (C <sub>3</sub> H <sub>8</sub> O)                                                                             | 24.04 | 4.06 ± 0.69  |
| Lauric acid (TMS)                                           | C <sub>15</sub> H <sub>32</sub> O <sub>2</sub> Si | 271  | 257 (C <sub>14</sub> H <sub>29</sub> O <sub>2</sub> Si), 117* (C <sub>4</sub> H <sub>9</sub> O <sub>2</sub> Si)                                                         | 24.68 | 3.12 ± 0.53  |
| Tetradecane, 2,6,10-trimethyl-                              | C <sub>17</sub> H <sub>36</sub>                   | 239  | 85 (C <sub>6</sub> H <sub>13</sub> ), 71 (C <sub>5</sub> H <sub>11</sub> ), 57* (C <sub>4</sub> H <sub>9</sub> )                                                        | 25.65 | 0.96 ± 0.08  |
| Heptadecane, 2,6,10,15-tetramethyl-                         | C <sub>21</sub> H <sub>44</sub>                   | 295  | 85 (C <sub>6</sub> H <sub>13</sub> ), 71 (C <sub>5</sub> H <sub>11</sub> ), 57* (C <sub>4</sub> H <sub>9</sub> )                                                        | 26.84 | 1.59 ± 0.26  |
| Myristic acid, trimethylsilyl ester                         | C <sub>17</sub> H <sub>36</sub> O <sub>2</sub> Si | 299  | 285 (C <sub>16</sub> H <sub>33</sub> O <sub>2</sub> Si), 117 (C <sub>4</sub> H <sub>9</sub> O <sub>2</sub> Si), 73* (C <sub>3</sub> H <sub>9</sub> Si)                  | 28.88 | 13.72 ± 2.04 |
| Pentadecanoic acid, TMS ester                               | C <sub>18</sub> H <sub>38</sub> O <sub>2</sub> Si | 313  | 299 (C <sub>17</sub> H <sub>35</sub> O <sub>2</sub> Si), 117* (C <sub>4</sub> H <sub>9</sub> O <sub>2</sub> Si)                                                         | 30.84 | 4.28 ± 0.59  |
| Ethyl palmitate                                             | C <sub>18</sub> H <sub>36</sub> O <sub>2</sub>    | 283  | 157 (C <sub>9</sub> H <sub>17</sub> O <sub>2</sub> ), 101 (C <sub>5</sub> H <sub>9</sub> O <sub>2</sub> ), 88* (C <sub>4</sub> H <sub>8</sub> O <sub>2</sub> )          | 31.69 | 14.23 ± 1.74 |
| cis-9-Hexadecenoic acid, trimethylsilyl ester               | C <sub>19</sub> H <sub>38</sub> O <sub>2</sub> Si | 325  | 311 (C <sub>18</sub> H <sub>35</sub> O <sub>2</sub> Si), 145 (C <sub>6</sub> H <sub>13</sub> O <sub>2</sub> Si), 117* (C <sub>4</sub> H <sub>9</sub> O <sub>2</sub> Si) | 32.24 | 6.58 ± 1.33  |

|                                                 |                                                   |     |                                                                                                                                                                                           |       |              |
|-------------------------------------------------|---------------------------------------------------|-----|-------------------------------------------------------------------------------------------------------------------------------------------------------------------------------------------|-------|--------------|
| Palmitic acid, TMS                              | C <sub>19</sub> H <sub>40</sub> O <sub>2</sub> Si | 327 | 313 (C <sub>18</sub> H <sub>37</sub> O <sub>2</sub> Si), 117 (C <sub>4</sub> H <sub>9</sub> O <sub>2</sub> Si), 73* (C <sub>3</sub> H <sub>9</sub> Si)                                    | 32.77 | 92.25 ± 3.52 |
| cis-10-Heptadecenoic acid, trimethylsilyl ester | C <sub>20</sub> H <sub>40</sub> O <sub>2</sub> Si | 339 | 325* (C <sub>19</sub> H <sub>37</sub> O <sub>2</sub> Si), 145 (C <sub>6</sub> H <sub>13</sub> O <sub>2</sub> Si), 117 (C <sub>4</sub> H <sub>9</sub> O <sub>2</sub> Si)                   | 34.09 | 2.02 ± 0.46  |
| Heptadecanoic acid, TMS                         | C <sub>20</sub> H <sub>42</sub> O <sub>2</sub> Si | 341 | 327 (C <sub>19</sub> H <sub>39</sub> O <sub>2</sub> Si), 117 (C <sub>4</sub> H <sub>9</sub> O <sub>2</sub> Si), 73* (C <sub>3</sub> H <sub>9</sub> Si)                                    | 34.52 | 5.69 ± 0.85  |
| 9,12-Octadecadienoic acid, ethyl ester          | C <sub>20</sub> H <sub>36</sub> O <sub>2</sub>    | 307 | 95 (C <sub>7</sub> H <sub>11</sub> ), 81 (C <sub>6</sub> H <sub>9</sub> ), 67* (C <sub>5</sub> H <sub>7</sub> )                                                                           | 34.79 | 15.18 ± 0.78 |
| Ethyl 9,12,15-octadecatrienoate                 | C <sub>20</sub> H <sub>34</sub> O <sub>2</sub>    | 305 | 108 (C <sub>8</sub> H <sub>12</sub> ), 95 (C <sub>7</sub> H <sub>11</sub> ), 79* (C <sub>6</sub> H <sub>7</sub> )                                                                         | 34.91 | 28.66 ± 1.16 |
| Linoleic acid, TMS                              | C <sub>21</sub> H <sub>40</sub> O <sub>2</sub> Si | 351 | 262 (C <sub>18</sub> H <sub>30</sub> O), 129 (C <sub>5</sub> H <sub>9</sub> O <sub>2</sub> Si), 73* (C <sub>3</sub> H <sub>9</sub> Si)                                                    | 35.72 | 58.24 ± 3.59 |
| α-Linolenic acid, TMS                           | C <sub>21</sub> H <sub>38</sub> O <sub>2</sub> Si | 349 | 129 (C <sub>5</sub> H <sub>9</sub> O <sub>2</sub> Si), 95 (C <sub>7</sub> H <sub>11</sub> ), 73* (C <sub>3</sub> H <sub>9</sub> Si)                                                       | 35.87 | 93.22 ± 2.48 |
| Octadecanoic acid, TMS                          | C <sub>21</sub> H <sub>44</sub> O <sub>2</sub> Si | 355 | 341 (C <sub>20</sub> H <sub>41</sub> O <sub>2</sub> Si), 117* (C <sub>4</sub> H <sub>9</sub> O <sub>2</sub> Si)                                                                           | 36.28 | 81.87 ± 1.36 |
| α-Amyrin                                        | C <sub>30</sub> H <sub>50</sub> O                 | 425 | 218* (C <sub>16</sub> H <sub>26</sub> ), 203 (C <sub>15</sub> H <sub>23</sub> )                                                                                                           | 43.82 | 7.04 ± 0.92  |
| Squalene                                        | C <sub>30</sub> H <sub>50</sub>                   | 409 | 81 (C <sub>6</sub> H <sub>9</sub> ), 69* (C <sub>5</sub> H <sub>9</sub> )                                                                                                                 | 45.20 | 18.48 ± 1.63 |
| Ethyl iso-allocholate                           | C <sub>26</sub> H <sub>44</sub> O <sub>5</sub>    | 435 | 253 (C <sub>15</sub> H <sub>25</sub> O <sub>3</sub> ), 129 (C <sub>7</sub> H <sub>13</sub> O <sub>2</sub> ), 107 (C <sub>8</sub> H <sub>11</sub> ), 55* (C <sub>3</sub> H <sub>3</sub> O) | 49.74 | 2.25 ± 0.55  |
| β-Sitosterol TMS                                | C <sub>32</sub> H <sub>58</sub> OSi               | 485 | 396 (C <sub>29</sub> H <sub>48</sub> ), 255 (C <sub>19</sub> H <sub>27</sub> ), 129* (C <sub>6</sub> H <sub>13</sub> OSi)                                                                 | 53.19 | 7.21 ± 0.34  |

\* = Base peak; # = Relative abundance after baseline normalization.

### Phytochemicals identified in *Aloe jucunda* Reynolds

| Compound name                          | Formula                                                        | [M-H] <sup>-</sup> | Identifying mass fragments                                                                                                                                            | Retention time | Relative abundance |
|----------------------------------------|----------------------------------------------------------------|--------------------|-----------------------------------------------------------------------------------------------------------------------------------------------------------------------|----------------|--------------------|
| Benzaldehyde                           | C <sub>7</sub> H <sub>6</sub> O                                | 105                | 77* (C <sub>6</sub> H <sub>5</sub> )                                                                                                                                  | 6.52           | 0.48 ± 0.16        |
| Lactic acid, bis-TMS                   | C <sub>9</sub> H <sub>22</sub> O <sub>3</sub> Si <sub>2</sub>  | 233                | 147 (C <sub>5</sub> H <sub>11</sub> O <sub>3</sub> Si), 117 (C <sub>5</sub> H <sub>13</sub> O <sub>3</sub> Si), 73* (C <sub>3</sub> H <sub>9</sub> Si)                | 9.42           | 0.96 ± 0.22        |
| Phenol, 2-ethyl, TMS                   | C <sub>11</sub> H <sub>18</sub> OSi                            | 193                | 179 (C <sub>10</sub> H <sub>15</sub> O <sub>2</sub> Si), 103 (C <sub>4</sub> H <sub>11</sub> O <sub>2</sub> Si), 73* (C <sub>3</sub> H <sub>9</sub> Si)               | 13.92          | 0.24 ± 0.07        |
| Benzoic acid, TMS                      | C <sub>10</sub> H <sub>14</sub> O <sub>2</sub> Si              | 193                | 179 (C <sub>9</sub> H <sub>11</sub> O <sub>2</sub> Si), 105* (C <sub>7</sub> H <sub>5</sub> O)                                                                        | 14.46          | 0.39 ± 0.04        |
| Octanoic acid, TMS ester               | C <sub>11</sub> H <sub>24</sub> O <sub>2</sub> Si              | 315                | 201* (C <sub>10</sub> H <sub>21</sub> O <sub>2</sub> Si), 145 (C <sub>8</sub> H <sub>17</sub> O <sub>2</sub> )                                                        | 14.98          | 0.53 ± 0.08        |
| Phosphoric acid, triTMS                | C <sub>9</sub> H <sub>27</sub> O <sub>4</sub> PSi <sub>3</sub> | 313                | 299* (C <sub>8</sub> H <sub>24</sub> O <sub>4</sub> PSi <sub>3</sub> ), 211 (C <sub>5</sub> H <sub>16</sub> O <sub>3</sub> PSi)                                       | 15.62          | 45.22 ± 2.58       |
| Phenylacetic acid, monoTMS             | C <sub>11</sub> H <sub>16</sub> O <sub>2</sub> Si              | 208                | 193 (C <sub>10</sub> H <sub>13</sub> O <sub>2</sub> Si), 91 (C <sub>7</sub> H <sub>7</sub> ), 73* (C <sub>3</sub> H <sub>9</sub> Si)                                  | 15.88          | 1.68 ± 0.43        |
| Benzene, 4-ethyl-1,2-dimethoxy-        | C <sub>10</sub> H <sub>14</sub> O <sub>2</sub>                 | 165                | 151* (C <sub>9</sub> H <sub>11</sub> O <sub>2</sub> ), 135 (C <sub>9</sub> H <sub>11</sub> O), 95 (C <sub>7</sub> H <sub>11</sub> )                                   | 16.52          | 1.27 ± 0.57        |
| Benzaldehyde, 2-[(trimethylsilyl)oxy]- | C <sub>10</sub> H <sub>14</sub> O <sub>2</sub> Si              | 193                | 179* (C <sub>9</sub> H <sub>11</sub> O <sub>2</sub> Si), 161 (C <sub>9</sub> H <sub>9</sub> O <sub>2</sub> Si), 149 (C <sub>8</sub> H <sub>9</sub> O <sub>2</sub> Si) | 16.88          | 0.79 ± 0.21        |
| 4-Vinylveratrole                       | C <sub>10</sub> H <sub>12</sub> O <sub>2</sub>                 | 163*               | 149 (C <sub>9</sub> H <sub>9</sub> O <sub>2</sub> ), 91 (C <sub>7</sub> H <sub>7</sub> )                                                                              | 17.67          | 1.37 ± 0.24        |
| Eugenol                                | C <sub>10</sub> H <sub>12</sub> O <sub>2</sub>                 | 163*               | 149 (C <sub>9</sub> H <sub>9</sub> O <sub>2</sub> ), 131 (C <sub>9</sub> H <sub>7</sub> O <sub>2</sub> ), 103 (C <sub>7</sub> H <sub>3</sub> O)                       | 17.78          | 1.85 ± 0.54        |
| Tetradecane                            | C <sub>14</sub> H <sub>30</sub>                                | 197                | 85 (C <sub>6</sub> H <sub>13</sub> ), 71 (C <sub>5</sub> H <sub>11</sub> ), 57* (C <sub>4</sub> H <sub>9</sub> )                                                      | 18.50          | 0.98 ± 0.16        |
| Methyleugenol                          | C <sub>11</sub> H <sub>14</sub> O <sub>2</sub>                 | 177*               | 163 (C <sub>10</sub> H <sub>11</sub> O <sub>2</sub> ), 147 (C <sub>10</sub> H <sub>11</sub> O)                                                                        | 18.64          | 6.21 ± 0.78        |

|                                           |                                                                |      |                                                                                                                                                                                         |       |              |
|-------------------------------------------|----------------------------------------------------------------|------|-----------------------------------------------------------------------------------------------------------------------------------------------------------------------------------------|-------|--------------|
| 2-Allyl-1,4-dimethoxy-3-methyl-benzene    | C <sub>12</sub> H <sub>16</sub> O <sub>2</sub>                 | 191* | 177 (C <sub>11</sub> H <sub>13</sub> O <sub>2</sub> ), 149 (C <sub>9</sub> H <sub>9</sub> O <sub>2</sub> ), 91 (C <sub>7</sub> H <sub>7</sub> )                                         | 19.49 | 0.34 ± 0.25  |
| 4-Allyl-2-methoxyphenoxy-TMS              | C <sub>13</sub> H <sub>20</sub> O <sub>2</sub> Si              | 235  | 206* (C <sub>11</sub> H <sub>14</sub> O <sub>2</sub> Si), 179 (C <sub>9</sub> H <sub>11</sub> O <sub>2</sub> Si)                                                                        | 20.26 | 14.89 ± 0.69 |
| Nonadecane                                | C <sub>19</sub> H <sub>40</sub>                                | 267  | 85 (C <sub>6</sub> H <sub>13</sub> ), 71 (C <sub>5</sub> H <sub>11</sub> ), 57* (C <sub>4</sub> H <sub>9</sub> )                                                                        | 21.00 | 0.66 ± 0.16  |
| Phenol, 3,5-bis(1,1-dimethylethyl)-       | C <sub>14</sub> H <sub>22</sub> O                              | 205  | 191* (C <sub>13</sub> H <sub>19</sub> O), 57 (C <sub>4</sub> H <sub>9</sub> )                                                                                                           | 21.33 | 0.58 ± 0.08  |
| 1,2-Dimethoxy-4-(2-methoxyethenyl)benzene | C <sub>11</sub> H <sub>14</sub> O <sub>3</sub>                 | 193* | 179 (C <sub>10</sub> H <sub>11</sub> O <sub>3</sub> ), 151 (C <sub>9</sub> H <sub>11</sub> O <sub>2</sub> ), 91 (C <sub>7</sub> H <sub>7</sub> )                                        | 21.43 | 0.52 ± 0.12  |
| 1-Dodecanol, O-TMS                        | C <sub>15</sub> H <sub>34</sub> OSi                            | 257  | 243* (C <sub>14</sub> H <sub>31</sub> OSi)                                                                                                                                              | 22.73 | 3.38 ± 0.75  |
| Estragole                                 | C <sub>10</sub> H <sub>12</sub> O                              | 147* | 133 (C <sub>9</sub> H <sub>9</sub> O), 121 (C <sub>8</sub> H <sub>9</sub> O), 77 (C <sub>6</sub> H <sub>5</sub> )                                                                       | 23.00 | 4.26 ± 0.59  |
| Dodecanoic acid, 1-methylethyl ester      | C <sub>15</sub> H <sub>30</sub> O <sub>2</sub>                 | 241  | 102 (C <sub>5</sub> H <sub>10</sub> O <sub>2</sub> ), 60* (C <sub>3</sub> H <sub>8</sub> O)                                                                                             | 24.01 | 1.04 ± 0.18  |
| 4-Hydroxybenzoic acid (2TMS)              | C <sub>13</sub> H <sub>22</sub> O <sub>3</sub> Si <sub>2</sub> | 281  | 267* (C <sub>12</sub> H <sub>19</sub> O <sub>3</sub> Si <sub>2</sub> ), 223 (C <sub>11</sub> H <sub>3</sub> O <sub>2</sub> Si), 193 (C <sub>10</sub> H <sub>13</sub> O <sub>2</sub> Si) | 24.16 | 0.65 ± 0.22  |
| Lauric acid (TMS)                         | C <sub>15</sub> H <sub>32</sub> O <sub>2</sub> Si              | 271  | 257 (C <sub>14</sub> H <sub>29</sub> O <sub>2</sub> Si), 117* (C <sub>4</sub> H <sub>9</sub> O <sub>2</sub> Si)                                                                         | 24.65 | 2.10 ± 0.46  |
| β-bisabolol                               | C <sub>15</sub> H <sub>26</sub> O                              | 221  | 204 (C <sub>15</sub> H <sub>24</sub> ), 119 (C <sub>9</sub> H <sub>11</sub> ), 93 (C <sub>7</sub> H <sub>9</sub> ), 81* (C <sub>6</sub> H <sub>9</sub> )                                | 25.06 | 1.87 ± 0.48  |
| Tetradecane, 2,6,10-trimethyl-            | C <sub>17</sub> H <sub>36</sub>                                | 239  | 85 (C <sub>6</sub> H <sub>13</sub> ), 71 (C <sub>5</sub> H <sub>11</sub> ), 57* (C <sub>4</sub> H <sub>9</sub> )                                                                        | 26.81 | 1.75 ± 0.27  |
| Geranyl isovalerate                       | C <sub>15</sub> H <sub>26</sub> O <sub>2</sub>                 | 237  | 121 (C <sub>9</sub> H <sub>13</sub> ), 103 (C <sub>5</sub> H <sub>11</sub> O <sub>2</sub> ), 85* (C <sub>5</sub> H <sub>9</sub> O)                                                      | 27.14 | 2.04 ± 0.52  |
| Tetradecanoic acid, (TMS)                 | C <sub>17</sub> H <sub>36</sub> O <sub>2</sub> Si              | 299  | 285 (C <sub>16</sub> H <sub>33</sub> O <sub>2</sub> Si), 117 (C <sub>4</sub> H <sub>9</sub> O <sub>2</sub> Si), 73* (C <sub>3</sub> H <sub>9</sub> Si)                                  | 28.85 | 21.22 ± 3.63 |
| Benzoic acid, 3,5-bis(1,1-dimethylethyl)- | C <sub>16</sub> H <sub>24</sub> O <sub>3</sub>                 | 263  | 249* (C <sub>15</sub> H <sub>21</sub> O <sub>3</sub> ), 233 (C <sub>15</sub> H <sub>21</sub> O <sub>2</sub> )                                                                           | 29.67 | 0.94 ± 0.20  |

|                                          |                                                   |     |                                                                                                                                                                |       |              |
|------------------------------------------|---------------------------------------------------|-----|----------------------------------------------------------------------------------------------------------------------------------------------------------------|-------|--------------|
| 4-hydroxy-, methyl ester                 |                                                   |     |                                                                                                                                                                |       |              |
| Hexadecanoic acid, methyl ester          | C <sub>17</sub> H <sub>34</sub> O <sub>2</sub>    | 269 | 143 (C <sub>8</sub> H <sub>15</sub> O <sub>2</sub> ), 87 (C <sub>4</sub> H <sub>7</sub> O <sub>2</sub> ), 74* (C <sub>3</sub> H <sub>6</sub> O <sub>2</sub> )  | 30.33 | 1.68 ± 0.56  |
| Phenol, 2,4,6-tris(1,1-dimethylethyl)-   | C <sub>18</sub> H <sub>30</sub> O                 | 261 | 247* (C <sub>17</sub> H <sub>27</sub> O)                                                                                                                       | 30.90 | 6.24 ± 0.21  |
| Ethyl palmitate                          | C <sub>18</sub> H <sub>36</sub> O <sub>2</sub>    | 283 | 157 (C <sub>9</sub> H <sub>17</sub> O <sub>2</sub> ), 101 (C <sub>5</sub> H <sub>9</sub> O <sub>2</sub> ), 88* (C <sub>4</sub> H <sub>8</sub> O <sub>2</sub> ) | 31.66 | 19.08 ± 2.57 |
| Palmitelaidic acid, trimethylsilyl ester | C <sub>19</sub> H <sub>38</sub> O <sub>2</sub> Si | 325 | 311 (C <sub>18</sub> H <sub>35</sub> O <sub>2</sub> Si), 117 (C <sub>4</sub> H <sub>9</sub> O <sub>2</sub> Si), 73* (C <sub>3</sub> H <sub>9</sub> Si)         | 32.20 | 2.48 ± 0.85  |
| Palmitic acid, TMS                       | C <sub>19</sub> H <sub>40</sub> O <sub>2</sub> Si | 327 | 313 (C <sub>18</sub> H <sub>37</sub> O <sub>2</sub> Si), 117 (C <sub>4</sub> H <sub>9</sub> O <sub>2</sub> Si), 73* (C <sub>3</sub> H <sub>9</sub> Si)         | 32.73 | 98.51 ± 1.03 |
| Linolenic acid, methyl ester             | C <sub>19</sub> H <sub>32</sub> O <sub>2</sub>    | 291 | 236 (C <sub>15</sub> H <sub>24</sub> O <sub>2</sub> ), 95 (C <sub>7</sub> H <sub>11</sub> ), 79* (C <sub>6</sub> H <sub>7</sub> )                              | 33.66 | 2.43 ± 0.34  |
| Heptadecanoic acid, TMS                  | C <sub>20</sub> H <sub>42</sub> O <sub>2</sub> Si | 341 | 327 (C <sub>19</sub> H <sub>39</sub> O <sub>2</sub> Si), 117 (C <sub>4</sub> H <sub>9</sub> O <sub>2</sub> Si), 73* (C <sub>3</sub> H <sub>9</sub> Si)         | 34.49 | 3.65 ± 0.61  |
| 9,12-Octadecadienoic acid, ethyl ester   | C <sub>20</sub> H <sub>36</sub> O <sub>2</sub>    | 307 | 95 (C <sub>7</sub> H <sub>11</sub> ), 81 (C <sub>6</sub> H <sub>9</sub> ), 67* (C <sub>5</sub> H <sub>7</sub> )                                                | 34.76 | 20.08 ± 2.11 |
| Ethyl 9,12,15-octadecatrienoate          | C <sub>20</sub> H <sub>34</sub> O <sub>2</sub>    | 305 | 108 (C <sub>8</sub> H <sub>12</sub> ), 95 (C <sub>7</sub> H <sub>11</sub> ), 79* (C <sub>6</sub> H <sub>7</sub> )                                              | 34.88 | 31.25 ± 1.63 |
| Stearic acid, ethyl ester                | C <sub>20</sub> H <sub>40</sub> O <sub>2</sub>    | 311 | 157 (C <sub>9</sub> H <sub>17</sub> O <sub>2</sub> ), 101 (C <sub>5</sub> H <sub>9</sub> O <sub>2</sub> ), 88* (C <sub>4</sub> H <sub>8</sub> O <sub>2</sub> ) | 35.32 | 3.78 ± 0.28  |
| Linoleic acid, TMS                       | C <sub>21</sub> H <sub>40</sub> O <sub>2</sub> Si | 351 | 262 (C <sub>18</sub> H <sub>30</sub> O), 129 (C <sub>5</sub> H <sub>9</sub> O <sub>2</sub> Si), 73* (C <sub>3</sub> H <sub>9</sub> Si)                         | 35.69 | 61.22 ± 2.94 |
| α-Linolenic acid, TMS                    | C <sub>21</sub> H <sub>38</sub> O <sub>2</sub> Si | 349 | 129 (C <sub>5</sub> H <sub>9</sub> O <sub>2</sub> Si), 95 (C <sub>7</sub> H <sub>11</sub> ), 73* (C <sub>3</sub> H <sub>9</sub> Si)                            | 35.83 | 91.69 ± 2.53 |
| Octadecanoic acid, TMS                   | C <sub>21</sub> H <sub>44</sub> O <sub>2</sub> Si | 355 | 341 (C <sub>20</sub> H <sub>41</sub> O <sub>2</sub> Si), 117* (C <sub>4</sub> H <sub>9</sub> O <sub>2</sub> Si)                                                | 36.25 | 78.22 ± 3.78 |

|                                              |                                                    |     |                                                                                                                                                                                           |       |              |
|----------------------------------------------|----------------------------------------------------|-----|-------------------------------------------------------------------------------------------------------------------------------------------------------------------------------------------|-------|--------------|
| Eicosanoic acid, TMS ester                   | C <sub>23</sub> H <sub>48</sub> O <sub>2</sub> Si  | 383 | 145 (C <sub>6</sub> H <sub>13</sub> O <sub>2</sub> Si), 117 (C <sub>4</sub> H <sub>9</sub> O <sub>2</sub> Si), 73* (C <sub>3</sub> H <sub>9</sub> Si)                                     | 39.47 | 2.04 ± 0.32  |
| Bumetrizole                                  | C <sub>17</sub> H <sub>18</sub> ClN <sub>3</sub> O | 314 | 300* (C <sub>16</sub> H <sub>15</sub> ClN <sub>3</sub> O), 272 (C <sub>15</sub> H <sub>15</sub> ClN <sub>3</sub> ), 147 (C <sub>10</sub> H <sub>11</sub> O)                               | 41.19 | 3.26 ± 0.58  |
| cis-13-Docosenoic acid, trimethylsilyl ester | C <sub>25</sub> H <sub>50</sub> O <sub>2</sub> Si  | 409 | 395 (C <sub>24</sub> H <sub>47</sub> O <sub>2</sub> Si), 129 (C <sub>5</sub> H <sub>9</sub> O <sub>2</sub> Si), 73* (C <sub>3</sub> H <sub>9</sub> Si)                                    | 42.13 | 0.75 ± 0.39  |
| Docosanoic acid, TMS ester                   | C <sub>25</sub> H <sub>52</sub> O <sub>2</sub> Si  | 411 | 397 (C <sub>24</sub> H <sub>49</sub> O <sub>2</sub> Si), 117* (C <sub>4</sub> H <sub>9</sub> O <sub>2</sub> Si)                                                                           | 42.48 | 1.18 ± 0.06  |
| Squalene                                     | C <sub>30</sub> H <sub>50</sub>                    | 409 | 81 (C <sub>6</sub> H <sub>9</sub> ), 69* (C <sub>5</sub> H <sub>9</sub> )                                                                                                                 | 45.18 | 48.67 ± 1.63 |
| Heptacosane                                  | C <sub>27</sub> H <sub>56</sub>                    | 379 | 85 (C <sub>6</sub> H <sub>13</sub> ), 71 (C <sub>5</sub> H <sub>11</sub> ), 57* (C <sub>4</sub> H <sub>9</sub> )                                                                          | 48.70 | 3.95 ± 0.87  |
| Ethyl iso-allocholate                        | C <sub>26</sub> H <sub>44</sub> O <sub>5</sub>     | 435 | 253 (C <sub>15</sub> H <sub>25</sub> O <sub>3</sub> ), 129 (C <sub>7</sub> H <sub>13</sub> O <sub>2</sub> ), 107 (C <sub>8</sub> H <sub>11</sub> ), 55* (C <sub>3</sub> H <sub>3</sub> O) | 49.33 | 0.63 ± 0.12  |
| β-Amyrin, TMS                                | C <sub>33</sub> H <sub>58</sub> O <sub>2</sub> Si  | 497 | 218* (C <sub>16</sub> H <sub>26</sub> ), 203 (C <sub>15</sub> H <sub>23</sub> )                                                                                                           | 53.38 | 2.58 ± 0.93  |

\* = Base peak; # = Relative abundance after baseline normalization.



## Phytochemicals identified in *Aloe albiflora* Guillaumin

| Compound name                                 | Formula                                                        | [M-H] | Identifying mass fragments                                                                                                                                             | Retention time | Relative abundance |
|-----------------------------------------------|----------------------------------------------------------------|-------|------------------------------------------------------------------------------------------------------------------------------------------------------------------------|----------------|--------------------|
| 2-Hexanol, trimethylsilyl ether               | C <sub>9</sub> H <sub>22</sub> OSi                             | 173   | 159 (C <sub>8</sub> H <sub>19</sub> OSi), 117* (C <sub>5</sub> H <sub>13</sub> OSi)                                                                                    | 5.78           | 0.45 ± 0.06        |
| Benzeneacetaldehyde                           | C <sub>8</sub> H <sub>8</sub> O                                | 119   | 91* (C <sub>7</sub> H <sub>7</sub> )                                                                                                                                   | 8.72           | 0.22 ± 0.08        |
| Lactic acid, bis-TMS                          | C <sub>9</sub> H <sub>22</sub> O <sub>3</sub> Si <sub>2</sub>  | 233   | 147 (C <sub>5</sub> H <sub>11</sub> O <sub>3</sub> Si), 117 (C <sub>5</sub> H <sub>13</sub> OSi), 73* (C <sub>3</sub> H <sub>9</sub> Si)                               | 9.41           | 1.02 ± 0.13        |
| Hydrocinnamic acid, benzyldimethylsilyl ester | C <sub>18</sub> H <sub>22</sub> O <sub>2</sub> Si              | 297   | 207* (C <sub>11</sub> H <sub>15</sub> O <sub>2</sub> Si), 91 (C <sub>7</sub> H <sub>7</sub> ), 75 (C <sub>6</sub> H <sub>3</sub> )                                     | 10.70          | 0.28 ± 0.08        |
| Benzaldehyde, 2,4-dimethyl-                   | C <sub>9</sub> H <sub>10</sub> O                               | 133*  | 105 (C <sub>8</sub> H <sub>9</sub> )                                                                                                                                   | 13.57          | 0.53 ± 0.11        |
| Phenol, 2-ethyl, TMS                          | C <sub>11</sub> H <sub>18</sub> OSi                            | 193   | 179 (C <sub>10</sub> H <sub>15</sub> OSi), 103 (C <sub>4</sub> H <sub>11</sub> OSi), 73* (C <sub>3</sub> H <sub>9</sub> Si)                                            | 13.91          | 6.08 ± 0.24        |
| 9-Decen-1-ol, trimethylsilyl ether            | C <sub>13</sub> H <sub>28</sub> OSi                            | 227   | 213 (C <sub>12</sub> H <sub>25</sub> OSi), 103 (C <sub>4</sub> H <sub>1</sub> OSi), 75* (C <sub>2</sub> H <sub>7</sub> OSi)                                            | 15.05          | 0.84 ± 0.09        |
| Phosphoric acid, triTMS                       | C <sub>9</sub> H <sub>27</sub> O <sub>4</sub> PSi <sub>3</sub> | 313   | 299* (C <sub>8</sub> H <sub>24</sub> O <sub>4</sub> PSi <sub>3</sub> ), 211 (C <sub>5</sub> H <sub>16</sub> O <sub>3</sub> PSi)                                        | 15.59          | 22.15 ± 1.65       |
| Benzeneacetic acid, trimethylsilyl ester      | C <sub>11</sub> H <sub>16</sub> O <sub>2</sub> Si              | 207   | 164 (C <sub>10</sub> H <sub>12</sub> O <sub>2</sub> Si), 91 (C <sub>7</sub> H <sub>7</sub> ), 73* (C <sub>3</sub> H <sub>9</sub> Si)                                   | 15.87          | 1.24 ± 0.47        |
| Nonanoic acid, trimethylsilyl ester           | C <sub>12</sub> H <sub>26</sub> O <sub>2</sub> Si              | 229   | 215* (C <sub>11</sub> H <sub>23</sub> O <sub>2</sub> Si), 129 (C <sub>5</sub> H <sub>9</sub> O <sub>2</sub> Si), 117 (C <sub>4</sub> H <sub>9</sub> O <sub>2</sub> Si) | 17.56          | 0.37 ± 0.06        |
| Phenol, 2-methoxy-3-(2-propenyl)-             | C <sub>10</sub> H <sub>12</sub> O <sub>2</sub>                 | 163*  | 149 (C <sub>9</sub> H <sub>9</sub> O <sub>2</sub> ), 131 (C <sub>9</sub> H <sub>7</sub> O)                                                                             | 17.76          | 0.68 ± 0.12        |

|                                                          |                                                                |      |                                                                                                                                                          |       |              |
|----------------------------------------------------------|----------------------------------------------------------------|------|----------------------------------------------------------------------------------------------------------------------------------------------------------|-------|--------------|
| Phenol, 3-(2-trimethylsilyloxyethyl)-                    | C <sub>11</sub> H <sub>18</sub> O <sub>2</sub> Si              | 209  | 195 (C <sub>10</sub> H <sub>15</sub> O <sub>2</sub> Si), 103 (C <sub>4</sub> H <sub>11</sub> O <sub>2</sub> Si), 73* (C <sub>3</sub> H <sub>9</sub> Si)  | 18.46 | 0.92 ± 0.35  |
| Methyleugenol                                            | C <sub>11</sub> H <sub>14</sub> O <sub>2</sub>                 | 177* | 163 (C <sub>10</sub> H <sub>11</sub> O <sub>2</sub> ), 147 (C <sub>10</sub> H <sub>11</sub> O)                                                           | 18.63 | 0.30 ± 0.04  |
| 1,2-Ethandiol, phenyl, bis-TMS                           | C <sub>14</sub> H <sub>26</sub> O <sub>2</sub> Si <sub>2</sub> | 281  | 179* (C <sub>10</sub> H <sub>15</sub> O <sub>2</sub> Si), 147 (C <sub>9</sub> H <sub>7</sub> O <sub>2</sub> )                                            | 19.49 | 0.87 ± 0.15  |
| 4-Allyl-2-methoxyphenoxy-TMS                             | C <sub>13</sub> H <sub>20</sub> O <sub>2</sub> Si              | 235  | 206* (C <sub>11</sub> H <sub>14</sub> O <sub>2</sub> Si), 179 (C <sub>9</sub> H <sub>11</sub> O <sub>2</sub> Si)                                         | 20.25 | 16.34 ± 0.73 |
| Phenol, 2,4-bis(1,1-dimethylethyl)- (Antioxidant No. 33) | C <sub>14</sub> H <sub>22</sub> O                              | 205  | 206* (C <sub>11</sub> H <sub>14</sub> O <sub>2</sub> Si), 179 (C <sub>9</sub> H <sub>11</sub> O <sub>2</sub> Si)                                         | 21.32 | 0.52 ± 0.08  |
| 2-methyl-1-Hexadecanol                                   | C <sub>17</sub> H <sub>36</sub> O                              | 255  | 69 (C <sub>5</sub> H <sub>9</sub> ), 57* (C <sub>4</sub> H <sub>9</sub> )                                                                                | 22.25 | 0.31 ± 0.02  |
| Nonadecane                                               | C <sub>19</sub> H <sub>40</sub>                                | 267  | 85 (C <sub>6</sub> H <sub>13</sub> ), 71 (C <sub>5</sub> H <sub>11</sub> ), 57* (C <sub>4</sub> H <sub>9</sub> )                                         | 23.37 | 2.03 ± 0.68  |
| Dodecanoic acid, 1-methylethyl ester                     | C <sub>15</sub> H <sub>30</sub> O <sub>2</sub>                 | 241  | 102 (C <sub>5</sub> H <sub>10</sub> O <sub>2</sub> ), 60* (C <sub>3</sub> H <sub>8</sub> O)                                                              | 24.00 | 3.65 ± 0.33  |
| Lauric acid (TMS)                                        | C <sub>15</sub> H <sub>32</sub> O <sub>2</sub> Si              | 271  | 257 (C <sub>14</sub> H <sub>29</sub> O <sub>2</sub> Si), 117* (C <sub>4</sub> H <sub>9</sub> O <sub>2</sub> Si)                                          | 24.64 | 1.19 ± 0.21  |
| β-bisabolol                                              | C <sub>15</sub> H <sub>26</sub> O                              | 221  | 204 (C <sub>15</sub> H <sub>24</sub> ), 119 (C <sub>9</sub> H <sub>11</sub> ), 93 (C <sub>7</sub> H <sub>9</sub> ), 81* (C <sub>6</sub> H <sub>9</sub> ) | 25.05 | 0.24 ±       |
| Tetradecane, 2,6,10-trimethyl-                           | C <sub>17</sub> H <sub>36</sub>                                | 239  | 85 (C <sub>6</sub> H <sub>13</sub> ), 71 (C <sub>5</sub> H <sub>11</sub> ), 57* (C <sub>4</sub> H <sub>9</sub> )                                         | 25.75 | 1.62 ± 0.56  |
| tert-Hexadecanethiol                                     | C <sub>16</sub> H <sub>34</sub> S                              | 257  | 83 (C <sub>6</sub> H <sub>11</sub> ), 69 (C <sub>5</sub> H <sub>9</sub> ), 57* (C <sub>4</sub> H <sub>9</sub> )                                          | 26.50 | 0.25 ± 0.22  |
| Tetradecanoic acid, (TMS)                                | C <sub>17</sub> H <sub>36</sub> O <sub>2</sub> Si              | 299  | 285 (C <sub>16</sub> H <sub>33</sub> O <sub>2</sub> Si), 117 (C <sub>4</sub> H <sub>9</sub> O <sub>2</sub> Si), 73* (C <sub>3</sub> H <sub>9</sub> Si)   | 28.84 | 9.05 ± 0.89  |
| Pentadecanoic acid, TMS ester                            | C <sub>18</sub> H <sub>38</sub> O <sub>2</sub> Si              | 313  | 299 (C <sub>17</sub> H <sub>35</sub> O <sub>2</sub> Si), 117* (C <sub>4</sub> H <sub>9</sub> O <sub>2</sub> Si)                                          | 30.80 | 1.38 ± 0.53  |

|                                               |                                                   |     |                                                                                                                                                                         |       |              |
|-----------------------------------------------|---------------------------------------------------|-----|-------------------------------------------------------------------------------------------------------------------------------------------------------------------------|-------|--------------|
| Hexadecanoic acid, ethyl ester                | C <sub>18</sub> H <sub>36</sub> O <sub>2</sub>    | 283 | 239 (C <sub>16</sub> H <sub>31</sub> O), 101 (C <sub>5</sub> H <sub>9</sub> O <sub>2</sub> ), 88* (C <sub>4</sub> H <sub>8</sub> O <sub>2</sub> )                       | 31.65 | 1.88 ± 0.38  |
| cis-9-Hexadecenoic acid, trimethylsilyl ester | C <sub>19</sub> H <sub>38</sub> O <sub>2</sub> Si | 325 | 311 (C <sub>18</sub> H <sub>35</sub> O <sub>2</sub> Si), 145 (C <sub>6</sub> H <sub>13</sub> O <sub>2</sub> Si), 117* (C <sub>4</sub> H <sub>9</sub> O <sub>2</sub> Si) | 32.20 | 2.26 ± 0.52  |
| Palmitic acid, TMS                            | C <sub>19</sub> H <sub>40</sub> O <sub>2</sub> Si | 327 | 313 (C <sub>18</sub> H <sub>37</sub> O <sub>2</sub> Si), 117 (C <sub>4</sub> H <sub>9</sub> O <sub>2</sub> Si), 73* (C <sub>3</sub> H <sub>9</sub> Si)                  | 32.71 | 97.63 ± 2.48 |
| cis-13-Eicosenoic acid                        | C <sub>20</sub> H <sub>38</sub> O <sub>2</sub>    | 309 | 292 (C <sub>20</sub> H <sub>36</sub> O), 69 (C <sub>5</sub> H <sub>9</sub> ), 55* (C <sub>4</sub> H <sub>7</sub> )                                                      | 33.05 | 0.18 ± 0.05  |
| Heptadecanoic acid, TMS                       | C <sub>20</sub> H <sub>42</sub> O <sub>2</sub> Si | 341 | 327 (C <sub>19</sub> H <sub>39</sub> O <sub>2</sub> Si), 117 (C <sub>4</sub> H <sub>9</sub> O <sub>2</sub> Si), 73* (C <sub>3</sub> H <sub>9</sub> Si)                  | 34.48 | 2.47 ± 0.29  |
| Ethyl 9,12,15-octadecatrienoate               | C <sub>20</sub> H <sub>34</sub> O <sub>2</sub>    | 305 | 108 (C <sub>8</sub> H <sub>12</sub> ), 95 (C <sub>7</sub> H <sub>11</sub> ), 79* (C <sub>6</sub> H <sub>7</sub> )                                                       | 34.87 | 2.53 ± 0.48  |
| Linoleic acid, TMS                            | C <sub>21</sub> H <sub>40</sub> O <sub>2</sub> Si | 351 | 262 (C <sub>18</sub> H <sub>30</sub> O), 129 (C <sub>5</sub> H <sub>9</sub> O <sub>2</sub> Si), 73* (C <sub>3</sub> H <sub>9</sub> Si)                                  | 35.66 | 21.67 ± 2.24 |
| α-Linolenic acid, TMS                         | C <sub>21</sub> H <sub>38</sub> O <sub>2</sub> Si | 349 | 129 (C <sub>5</sub> H <sub>9</sub> O <sub>2</sub> Si), 95 (C <sub>7</sub> H <sub>11</sub> ), 73* (C <sub>3</sub> H <sub>9</sub> Si)                                     | 35.80 | 48.05 ± 1.09 |
| Octadecanoic acid, TMS                        | C <sub>21</sub> H <sub>44</sub> O <sub>2</sub> Si | 355 | 341 (C <sub>20</sub> H <sub>41</sub> O <sub>2</sub> Si), 117* (C <sub>4</sub> H <sub>9</sub> O <sub>2</sub> Si)                                                         | 36.24 | 86.46 ± 2.65 |
| Eicosanoic acid, TMS ester                    | C <sub>23</sub> H <sub>48</sub> O <sub>2</sub> Si | 383 | 145 (C <sub>6</sub> H <sub>13</sub> O <sub>2</sub> Si), 117 (C <sub>4</sub> H <sub>9</sub> O <sub>2</sub> Si), 73* (C <sub>3</sub> H <sub>9</sub> Si)                   | 39.46 | 2.24 ± 0.35  |
| Squalene                                      | C <sub>30</sub> H <sub>50</sub>                   | 409 | 81 (C <sub>6</sub> H <sub>9</sub> ), 69* (C <sub>5</sub> H <sub>9</sub> )                                                                                               | 45.16 | 11.85 ± 1.17 |
| β-Sitosterol TMS                              | C <sub>32</sub> H <sub>58</sub> OSi               | 485 | 396 (C <sub>29</sub> H <sub>48</sub> ), 255 (C <sub>19</sub> H <sub>27</sub> ), 129* (C <sub>6</sub> H <sub>13</sub> OSi)                                               | 53.13 | 3.16 ± 0.46  |

\* = Base peak; # = Relative abundance after baseline normalization.

### Phytochemicals identified in *Aloe aspera* Haw.

| Compound name                                            | Formula                                                        | [M-H] <sup>-</sup> | Identifying mass fragments                                                                                                              | Retention time | Relative abundance |
|----------------------------------------------------------|----------------------------------------------------------------|--------------------|-----------------------------------------------------------------------------------------------------------------------------------------|----------------|--------------------|
| 2-Pentanol, trimethylsilyl ether                         | C <sub>8</sub> H <sub>20</sub> OSi                             | 159                | 145 (C <sub>7</sub> H <sub>17</sub> OSi), 117 (C <sub>5</sub> H <sub>13</sub> OSi)                                                      | 5.80           | 1.45 ± 0.25        |
| M-Pyrol                                                  | C <sub>5</sub> H <sub>9</sub> NO                               | 98*                | 71 (C <sub>3</sub> H <sub>5</sub> NO)                                                                                                   | 8.73           | 0.32 ± 0.04        |
| Lactic acid, (2TMS)                                      | C <sub>9</sub> H <sub>22</sub> O <sub>3</sub> Si <sub>2</sub>  | 233                | 147 (C <sub>5</sub> H <sub>11</sub> O <sub>3</sub> Si), 117 (C <sub>5</sub> H <sub>13</sub> OSi), 73* (C <sub>3</sub> H <sub>9</sub> i) | 9.42           | 3.86 ± .38         |
| Benzaldehyde, 3,5-dimethyl-                              | C <sub>9</sub> H <sub>10</sub> O                               | 133*               | 177 (C <sub>8</sub> H <sub>9</sub> )                                                                                                    | 13.57          | 1.54 ± 0.51        |
| Benzoic acid, TMS                                        | C <sub>10</sub> H <sub>14</sub> O <sub>2</sub> Si              | 193                | 179 (C <sub>9</sub> H <sub>11</sub> O <sub>2</sub> Si), 105* (C <sub>7</sub> H <sub>5</sub> O)                                          | 14.45          | 0.29 ± 0.02        |
| Phosphoric acid, triTMS                                  | C <sub>9</sub> H <sub>27</sub> O <sub>4</sub> PSi <sub>3</sub> | 313                | 299* (C <sub>8</sub> H <sub>24</sub> O <sub>4</sub> PSi <sub>3</sub> ), 211 (C <sub>5</sub> H <sub>16</sub> O <sub>3</sub> PSi)         | 15.59          | 32.18 ± 0.94       |
| Succinic acid (2TMS)                                     | C <sub>10</sub> H <sub>22</sub> O <sub>4</sub> Si <sub>2</sub> | 261                | 247 (C <sub>9</sub> H <sub>19</sub> O <sub>4</sub> Si <sub>2</sub> ), 147* (C <sub>6</sub> H <sub>15</sub> O <sub>2</sub> Si)           | 16.42          | 0.69 ± 0.18        |
| Fumaric acid (2TMS)                                      | C <sub>10</sub> H <sub>20</sub> O <sub>4</sub> Si <sub>2</sub> | 259                | 245* (C <sub>9</sub> H <sub>17</sub> O <sub>4</sub> Si <sub>2</sub> ), 147 (C <sub>4</sub> H <sub>1</sub> O <sub>2</sub> Si)            | 17.31          | 0.36 ± 0.07        |
| Nonanoic acid, TMS ester                                 | C <sub>12</sub> H <sub>26</sub> O <sub>2</sub> Si              | 229                | 215* (C <sub>11</sub> H <sub>23</sub> O <sub>2</sub> Si), 117 (C <sub>4</sub> H <sub>9</sub> O <sub>2</sub> Si)                         | 17.55          | 0.48 ± 0.12        |
| Tetradecane                                              | C <sub>14</sub> H <sub>30</sub>                                | 197                | 85 (C <sub>6</sub> H <sub>13</sub> ), 71 (C <sub>5</sub> H <sub>11</sub> ), 57* (C <sub>4</sub> H <sub>9</sub> )                        | 18.49          | 0.33 ± 0.04        |
| Decanoic acid, trimethylsilyl ester                      | C <sub>13</sub> H <sub>28</sub> O <sub>2</sub> Si              | 243                | 299* (C <sub>12</sub> H <sub>25</sub> O <sub>2</sub> Si), 117 (C <sub>4</sub> H <sub>9</sub> O <sub>2</sub> Si)                         | 20.03          | 0.24 ± 0.02        |
| Phenol, 2,4-bis(1,1-dimethylethyl)- (Antioxidant No. 33) | C <sub>14</sub> H <sub>22</sub> O                              | 205                | 191* (C <sub>13</sub> H <sub>19</sub> O), 57 (C <sub>4</sub> H <sub>9</sub> )                                                           | 21.32          | 0.39 ± 0.10        |
| Decane, 2,3,5,8-tetramethyl-                             | C <sub>14</sub> H <sub>30</sub>                                | 197                | 85 (C <sub>6</sub> H <sub>13</sub> ), 71 (C <sub>5</sub> H <sub>11</sub> ), 57* (C <sub>4</sub> H <sub>9</sub> )                        | 22.00          | 0.67 ± 0.14        |
| 2-methyl-1-                                              | C <sub>17</sub> H <sub>36</sub> O                              | 255                | 69 (C <sub>5</sub> H <sub>9</sub> ), 57* (C <sub>4</sub> H <sub>9</sub> )                                                               | 22.24          | 0.20 ± 0.03        |

|                                               |                                                                |     |                                                                                                                                                                         |       |              |
|-----------------------------------------------|----------------------------------------------------------------|-----|-------------------------------------------------------------------------------------------------------------------------------------------------------------------------|-------|--------------|
| Hexadecanol                                   |                                                                |     |                                                                                                                                                                         |       |              |
| Hexadecane                                    | C <sub>16</sub> H <sub>34</sub>                                | 225 | 85 (C <sub>6</sub> H <sub>13</sub> ), 71 (C <sub>5</sub> H <sub>11</sub> ), 57* (C <sub>4</sub> H <sub>9</sub> )                                                        | 23.36 | 0.45 ± 0.06  |
| Dodecanoic acid, 1-methylethyl ester          | C <sub>15</sub> H <sub>30</sub> O <sub>2</sub>                 | 241 | 102 (C <sub>5</sub> H <sub>10</sub> O <sub>2</sub> ), 60* (C <sub>3</sub> H <sub>8</sub> O)                                                                             | 24.00 | 0.53 ± 0.15  |
| Lauric acid (TMS)                             | C <sub>15</sub> H <sub>32</sub> O <sub>2</sub> Si              | 271 | 257 (C <sub>14</sub> H <sub>29</sub> O <sub>2</sub> Si), 117* (C <sub>4</sub> H <sub>9</sub> O <sub>2</sub> Si)                                                         | 24.63 | 0.44 ± 0.09  |
| Nonadecane                                    | C <sub>19</sub> H <sub>40</sub>                                | 267 | 85 (C <sub>6</sub> H <sub>13</sub> ), 71 (C <sub>5</sub> H <sub>11</sub> ), 57* (C <sub>4</sub> H <sub>9</sub> )                                                        | 25.61 | 0.35 ± 0.11  |
| Heptadecane, 2,6,10,15-tetramethyl-           | C <sub>21</sub> H <sub>44</sub>                                | 295 | 85 (C <sub>6</sub> H <sub>13</sub> ), 71 (C <sub>5</sub> H <sub>11</sub> ), 57* (C <sub>4</sub> H <sub>9</sub> )                                                        | 26.80 | 0.71 ± 0.36  |
| Tetradecane, 2,6,10-trimethyl-                | C <sub>17</sub> H <sub>36</sub>                                | 239 | 85 (C <sub>6</sub> H <sub>13</sub> ), 71 (C <sub>5</sub> H <sub>11</sub> ), 57* (C <sub>4</sub> H <sub>9</sub> )                                                        | 27.76 | 0.58 ± 0.24  |
| Azelaic acid, diTMS                           | C <sub>15</sub> H <sub>32</sub> O <sub>4</sub> Si <sub>2</sub> | 331 | 201 (C <sub>10</sub> H <sub>21</sub> O <sub>2</sub> Si), 129 (C <sub>5</sub> H <sub>9</sub> O <sub>2</sub> Si), 73* (C <sub>3</sub> H <sub>9</sub> Si)                  | 27.88 | 0.48 ± 0.18  |
| Myristic acid, isopropyl ester                | C <sub>17</sub> H <sub>34</sub> O <sub>2</sub>                 | 269 | 228 (C <sub>14</sub> H <sub>28</sub> O <sub>2</sub> ), 102* (C <sub>5</sub> H <sub>10</sub> O <sub>2</sub> )                                                            | 28.31 | 0.24 ± 0.03  |
| Tetradecanoic acid (TMS)                      | C <sub>17</sub> H <sub>36</sub> O <sub>2</sub> Si              | 299 | 285 (C <sub>16</sub> H <sub>33</sub> O <sub>2</sub> Si), 117 (C <sub>4</sub> H <sub>9</sub> O <sub>2</sub> Si), 73* (C <sub>3</sub> H <sub>9</sub> Si)                  | 28.84 | 6.63 ± 0.27  |
| Pentadecanoic acid, TMS ester                 | C <sub>18</sub> H <sub>38</sub> O <sub>2</sub> Si              | 313 | 299 (C <sub>17</sub> H <sub>35</sub> O <sub>2</sub> Si), 117* (C <sub>4</sub> H <sub>9</sub> O <sub>2</sub> Si)                                                         | 30.80 | 1.74 ± 0.14  |
| cis-9-Hexadecenoic acid, trimethylsilyl ester | C <sub>19</sub> H <sub>38</sub> O <sub>2</sub> Si              | 325 | 311 (C <sub>18</sub> H <sub>35</sub> O <sub>2</sub> Si), 145 (C <sub>6</sub> H <sub>13</sub> O <sub>2</sub> Si), 117* (C <sub>4</sub> H <sub>9</sub> O <sub>2</sub> Si) | 32.19 | 0.59 ± 0.08  |
| Palmitic acid, TMS                            | C <sub>19</sub> H <sub>40</sub> O <sub>2</sub> Si              | 327 | 313 (C <sub>18</sub> H <sub>37</sub> O <sub>2</sub> Si), 117 (C <sub>4</sub> H <sub>9</sub> O <sub>2</sub> Si), 73* (C <sub>3</sub> H <sub>9</sub> Si)                  | 32.72 | 98.15 ± 2.56 |
| Heneicosane                                   | C <sub>21</sub> H <sub>44</sub>                                | 295 | 85 (C <sub>6</sub> H <sub>13</sub> ), 71 (C <sub>6</sub> H <sub>11</sub> ), 57* (C <sub>4</sub> H <sub>9</sub> )                                                        | 33.61 | 0.46 ± 0.09  |
| Heptadecanoic acid, TMS                       | C <sub>20</sub> H <sub>42</sub> O <sub>2</sub> Si              | 341 | 327 (C <sub>19</sub> H <sub>39</sub> O <sub>2</sub> Si), 117 (C <sub>4</sub> H <sub>9</sub> O <sub>2</sub> Si), 73* (C <sub>3</sub> H <sub>9</sub> Si)                  | 34.48 | 1.97 ± 0.24  |
| Linoleic acid, TMS                            | C <sub>21</sub> H <sub>40</sub> O <sub>2</sub> Si              | 351 | 262 (C <sub>18</sub> H <sub>30</sub> O), 129 (C <sub>5</sub> H <sub>9</sub> O <sub>2</sub> Si), 73* (C <sub>3</sub> H <sub>9</sub> Si)                                  | 35.67 | 31.86 ± 1.09 |
| Oleic acid,                                   | C <sub>21</sub> H <sub>42</sub> O <sub>2</sub> Si              | 353 | 339 (C <sub>20</sub> H <sub>39</sub> O <sub>2</sub> Si), 117 (C <sub>4</sub> H <sub>9</sub> O <sub>2</sub> Si), 73*                                                     | 35.77 | 19.38 ± 0.68 |

|                                          |                                                   |      |                                                                                                                                                                                           |       |              |
|------------------------------------------|---------------------------------------------------|------|-------------------------------------------------------------------------------------------------------------------------------------------------------------------------------------------|-------|--------------|
| trimethylsilyl ester                     |                                                   |      | (C <sub>3</sub> H <sub>9</sub> Si)                                                                                                                                                        |       |              |
| Octadecanoic acid, TMS                   | C <sub>21</sub> H <sub>44</sub> O <sub>2</sub> Si | 355  | 341 (C <sub>20</sub> H <sub>41</sub> O <sub>2</sub> Si), 117* (C <sub>4</sub> H <sub>9</sub> O <sub>2</sub> Si)                                                                           | 36.24 | 96.45 ± 1.62 |
| Eicosanoic acid, TMS ester               | C <sub>23</sub> H <sub>48</sub> O <sub>2</sub> Si | 383  | 145 (C <sub>6</sub> H <sub>13</sub> O <sub>2</sub> Si), 117 (C <sub>4</sub> H <sub>9</sub> O <sub>2</sub> Si), 73* (C <sub>3</sub> H <sub>9</sub> Si)                                     | 39.46 | 5.22 ± 0.43  |
| 1-Docosanol, trimethylsilyl ether        | C <sub>25</sub> H <sub>54</sub> O <sub>2</sub> Si | 397  | 383* (C <sub>24</sub> H <sub>51</sub> O <sub>2</sub> Si), 103 (C <sub>4</sub> H <sub>9</sub> O <sub>2</sub> Si)                                                                           | 41.15 | 3.43 ± 0.31  |
| Docosanoic acid, TMS ester               | C <sub>25</sub> H <sub>52</sub> O <sub>2</sub> Si | 411  | 397 (C <sub>24</sub> H <sub>49</sub> O <sub>2</sub> Si), 117* (C <sub>4</sub> H <sub>9</sub> O <sub>2</sub> Si)                                                                           | 42.48 | 3.19 ± 0.78  |
| Squalene                                 | C <sub>30</sub> H <sub>50</sub>                   | 409  | 81 (C <sub>6</sub> H <sub>9</sub> ), 69* (C <sub>5</sub> H <sub>9</sub> )                                                                                                                 | 45.16 | 18.72 ± 0.63 |
| Tetracosanoic acid, trimethylsilyl ester | C <sub>27</sub> H <sub>56</sub> O <sub>2</sub> Si | 439  | 145 (C <sub>6</sub> H <sub>13</sub> O <sub>2</sub> Si), 117 (C <sub>4</sub> H <sub>9</sub> O <sub>2</sub> Si), 73* (C <sub>3</sub> H <sub>9</sub> Si)                                     | 45.29 | 26.34 ± 0.68 |
| Tocopherol-γ-tms-derivative              | C <sub>31</sub> H <sub>56</sub> O <sub>2</sub> Si | 487* | 263 (C <sub>15</sub> H <sub>23</sub> O <sub>2</sub> Si), 223 (C <sub>16</sub> H <sub>31</sub> ), 73*                                                                                      | 47.46 | 8.37 ± 0.52  |
| Ethyl iso-allocholate                    | C <sub>26</sub> H <sub>44</sub> O <sub>5</sub>    | 435  | 253 (C <sub>15</sub> H <sub>25</sub> O <sub>3</sub> ), 129 (C <sub>7</sub> H <sub>13</sub> O <sub>2</sub> ), 107 (C <sub>8</sub> H <sub>11</sub> ), 55* (C <sub>3</sub> H <sub>3</sub> O) | 49.69 | 0.48 ± 0.08  |
| 1-Heptatriacotanol                       | C <sub>37</sub> H <sub>76</sub> O                 | 535  | 69 (C <sub>5</sub> H <sub>9</sub> ), 55* (C <sub>4</sub> H <sub>7</sub> )                                                                                                                 | 50.10 | 0.41 ± 0.05  |
| Campesterol, TMS                         | C <sub>31</sub> H <sub>56</sub> O <sub>2</sub> Si | 471  | 382 (C <sub>28</sub> H <sub>46</sub> ), 343 (C <sub>25</sub> H <sub>43</sub> ), 129* (C <sub>6</sub> H <sub>13</sub> O <sub>2</sub> Si)                                                   | 51.45 | 3.66 ± 0.08  |
| Stigmasterol, TMS                        | C <sub>32</sub> H <sub>56</sub> O <sub>2</sub> Si | 483  | 394 (C <sub>29</sub> H <sub>46</sub> ), 255 (C <sub>19</sub> H <sub>27</sub> ), 129 (C <sub>6</sub> H <sub>13</sub> O <sub>2</sub> Si), 83* (C <sub>6</sub> H <sub>11</sub> )             | 52.03 | 19.02 ± 1.43 |
| β-Sitosterol TMS                         | C <sub>32</sub> H <sub>58</sub> O <sub>2</sub> Si | 485  | 396 (C <sub>29</sub> H <sub>48</sub> ), 255 (C <sub>19</sub> H <sub>27</sub> ), 129* (C <sub>6</sub> H <sub>13</sub> O <sub>2</sub> Si)                                                   | 53.21 | 53.48 ± 2.36 |

\* = Base peak; # = Relative abundance after baseline normalization.

## Additional Statistical Data

| Correlation Matrix |                     |                |                    |                   |                     |                  |
|--------------------|---------------------|----------------|--------------------|-------------------|---------------------|------------------|
|                    |                     | <i>A. vera</i> | <i>A. aristata</i> | <i>A. jukunda</i> | <i>A. albiflora</i> | <i>A. aspera</i> |
| Correlation        | <i>A. vera</i>      | 1.000          | -.626              | -.420             | -.578               | -.446            |
|                    | <i>A. aristata</i>  | -.626          | 1.000              | .790              | .708                | .899             |
|                    | <i>A. jukunda</i>   | -.420          | .790               | 1.000             | .503                | .881             |
|                    | <i>A. albiflora</i> | -.578          | .708               | .503              | 1.000               | .536             |
|                    | <i>A. asparata</i>  | -.446          | .899               | .881              | .536                | 1.000            |
| Sig. (1-tailed)    | <i>A. vera</i>      |                | .000               | .000              | .000                | .000             |
|                    | <i>A. aristata</i>  | .000           |                    | .000              | .000                | .000             |
|                    | <i>A. jukunda</i>   | .000           | .000               |                   | .000                | .000             |
|                    | <i>A. albiflora</i> | .000           | .000               | .000              |                     | .000             |
|                    | <i>A. aspera</i>    | .000           | .000               | .000              | .000                |                  |

## Total Variance Explained

| Component | Initial Eigenvalues |               |              | Extraction Sums of Squared Loadings |               |              | Rotation Sums of Squared Loadings |               |              |
|-----------|---------------------|---------------|--------------|-------------------------------------|---------------|--------------|-----------------------------------|---------------|--------------|
|           | Total               | % of Variance | Cumulative % | Total                               | % of Variance | Cumulative % | Total                             | % of Variance | Cumulative % |
| 1         | 3.591               | 71.817        | 71.817       | 3.591                               | 71.817        | 71.817       | 2.520                             | 50.403        | 50.403       |
| 2         | .778                | 15.550        | 87.367       | .778                                | 15.550        | 87.367       | 1.848                             | 36.965        | 87.367       |
| 3         | .412                | 8.233         | 95.601       |                                     |               |              |                                   |               |              |
| 4         | .169                | 3.375         | 98.976       |                                     |               |              |                                   |               |              |
| 5         | .051                | 1.024         | 100.000      |                                     |               |              |                                   |               |              |

Extraction Method: Principal Component Analysis.

| Component Matrix <sup>a</sup>                    |           |       |
|--------------------------------------------------|-----------|-------|
|                                                  | Component |       |
|                                                  | 1         | 2     |
| <i>A. vera</i>                                   | -.702     | .584  |
| <i>A. aristata</i>                               | .960      | .050  |
| <i>A. jukunda</i>                                | .866      | .392  |
| <i>A. albiflora</i>                              | .775      | -.390 |
| <i>A. asparata</i>                               | .909      | .358  |
| Extraction Method: Principal Component Analysis. |           |       |
| a. 2 components extracted.                       |           |       |

| Proximity Matrix    |                   |                    |                   |                     |                  |
|---------------------|-------------------|--------------------|-------------------|---------------------|------------------|
| Case                | Matrix File Input |                    |                   |                     |                  |
|                     | <i>A. vera</i>    | <i>A. aristata</i> | <i>A. jukunda</i> | <i>A. albiflora</i> | <i>A. aspera</i> |
| <i>A. vera</i>      | .000              | 195.082            | 170.410           | 189.330             | 173.536          |
| <i>A. aristata</i>  | 195.082           | .000               | 25.258            | 35.064              | 12.139           |
| <i>A. jukunda</i>   | 170.410           | 25.258             | .000              | 59.619              | 14.279           |
| <i>A. albiflora</i> | 189.330           | 35.064             | 59.619            | .000                | 55.678           |
| <i>A. asparata</i>  | 173.536           | 12.139             | 14.279            | 55.678              | .000             |



| Agglomeration Schedule |                  |           |              |                             |           |            |
|------------------------|------------------|-----------|--------------|-----------------------------|-----------|------------|
| Stage                  | Cluster Combined |           | Coefficients | Stage Cluster First Appears |           | Next Stage |
|                        | Cluster 1        | Cluster 2 |              | Cluster 1                   | Cluster 2 |            |
| 1                      | 2                | 5         | 12.139       | 0                           | 0         | 2          |
| 2                      | 2                | 3         | 19.769       | 1                           | 0         | 3          |
| 3                      | 2                | 4         | 50.120       | 2                           | 0         | 4          |
| 4                      | 1                | 2         | 182.090      | 0                           | 3         | 0          |
